# Supplementary material for: A microwave-assisted highly practical chemoselective esterification and amidation of carboxylic acids
Source: Royal Society of Chemistry journal article supplement (doi:10.1039/c6ra22558f), 2016-01-01
Supplement: c6ra22558f1.pdf [file c6ra22558f1.pdf]

## SUPPLEMENTARY INFORMATION

### **A Microwave-Assisted Highly Practical Chemoselective Esterification and Amidation of Carboxylic Acids**

GunindraPathak, Diparjun Das and Samuel LalthazualaRokhum\*

<sup>a</sup>Department of Chemistry, National Institute of Technology Silchar, Silchar-10, Assam, India

\* Corresponding author. Tel.: +91 3842 242915; fax: +91 3842-224797; email address: [rokhum@che.nits.ac.in](mailto:rokhum@che.nits.ac.in)

## Table of Contents

|                                                                                                              |      |
|--------------------------------------------------------------------------------------------------------------|------|
| General Remarks.....                                                                                         | S4   |
| <sup>1</sup> H & <sup>13</sup> C NMR spectra of Dodecylbenzoat.....                                          | S5   |
| <sup>1</sup> H & <sup>13</sup> C NMR spectra of Octyl 4-methoxybenzoate .....                                | S6   |
| <sup>1</sup> H & <sup>13</sup> C NMR spectra of Dodecyl 4-methoxybenzoate.....                               | S7   |
| <sup>1</sup> H & <sup>13</sup> C NMR spectra of Octadecyl 4-methylbenzoate.....                              | S8   |
| <sup>1</sup> H & <sup>13</sup> C NMR spectra of Octyl 4-nitrobenzoate.....                                   | S9   |
| <sup>1</sup> H & <sup>13</sup> C NMR spectra of <i>p</i> -Tolyl 4-nitrobenzoate.....                         | S10  |
| <sup>1</sup> H & <sup>13</sup> C NMR spectra of Dodecyl 3-nitrobenzoate .....                                | S11  |
| <sup>1</sup> H & <sup>13</sup> C NMR spectra of Octadecyl 4-flurobenzoate.....                               | S12  |
| <sup>1</sup> H & <sup>13</sup> C NMR spectra of Phenethyl 4-chlorobenzoate.....                              | S13  |
| <sup>1</sup> H & <sup>13</sup> C NMR spectra of Phenethyl propionate.....                                    | S14  |
| <sup>1</sup> H & <sup>13</sup> C NMR spectra of Octyl 2-ethylhexanoate.....                                  | S15  |
| <sup>1</sup> H-NMR spectra of Dodecyl 2-ethylhexanoate .....                                                 | S16  |
| <sup>1</sup> H & <sup>13</sup> C NMR spectra of Sec-butyl-2-ethylhexanoate.....                              | S17  |
| <sup>1</sup> H & <sup>13</sup> C NMR spectra of (1R,2S,5R)-2-isopropyl-5-methylcyclohexyl-2-ethylhexanoate.. | S.18 |
| <sup>1</sup> H & <sup>13</sup> C NMR spectra of Dodecyl-4-methylbenzoate.....                                | S19  |
| <sup>1</sup> H & <sup>13</sup> C NMR spectra of Phenethyl 4-methylbenzoate.....                              | S20  |
| <sup>1</sup> H & <sup>13</sup> C NMR spectra of Octyl 4-hydroxybenzoate .....                                | S21  |
| <sup>1</sup> H & <sup>13</sup> C NMR spectra of 6-Hydroxyhexyl benzoate.....                                 | S22  |
| <sup>1</sup> H & <sup>13</sup> C NMR spectra of 6-Hydroxyhexyl 4-nitrobenzoate.....                          | S23  |
| <sup>1</sup> H & <sup>13</sup> C NMR spectra of 6-Hydroxyhexyl propionate.....                               | S24  |
| <sup>1</sup> H & <sup>13</sup> C NMR spectra of N-benzylbenzamide.....                                       | S25  |
| <sup>1</sup> H & <sup>13</sup> C NMR spectra of N-cyclohexylbenzamide.....                                   | S26  |
| <sup>1</sup> H & <sup>13</sup> C NMR spectra of N-phenylbenzamide.....                                       | S27  |
| <sup>1</sup> H & <sup>13</sup> C NMR spectra of <i>N</i> -Cyclohexyl-4-nitrobenzamide.....                   | S28  |

### General Remarks

IR spectra were recorded on a Perkin–Elmer Spectrum One FTIR spectrometer.  $^1\text{H}$  and  $^{13}\text{C}$  NMR spectra were recorded on a Bruker (500 MHz, 400 MHz and 300 MHz) spectrometer using TMS as internal reference. Chemical shifts for  $^1\text{H}$  NMR spectra are reported (in parts per million) relative to internal tetramethylsilane ( $\text{Me}_4\text{Si}$   $\delta = 0.0$  ppm) with  $\text{CDCl}_3$  as solvents.  $^{13}\text{C}$  NMR spectra were recorded at 125 MHz and 100 MHz. Chemical shifts for  $^{13}\text{C}$  NMR spectra are reported (in parts per million) relative to internal tetramethylsilane ( $\text{Me}_4\text{Si}$   $\delta = 0.0$  ppm) with  $\text{CDCl}_3$  as solvent.  $^1\text{H}$  NMR data are reported in the order of chemical shift, multiplicity (s = singlet, d = doublet, t = triplet, dd = doublet of doublet, and m = multiplet), number of protons, and coupling constant in hertz (Hz). Mass spectra were obtained from Waters ZQ 4000 mass spectrometer by the ESI method, while the elemental analyses of the complexes were performed on a Perkin–Elmer-2400 CHN/S analyzer. TLC plates were visualized by exposing in iodine chamber, UV-lamp or spraying with  $\text{KMnO}_4$  and heating.

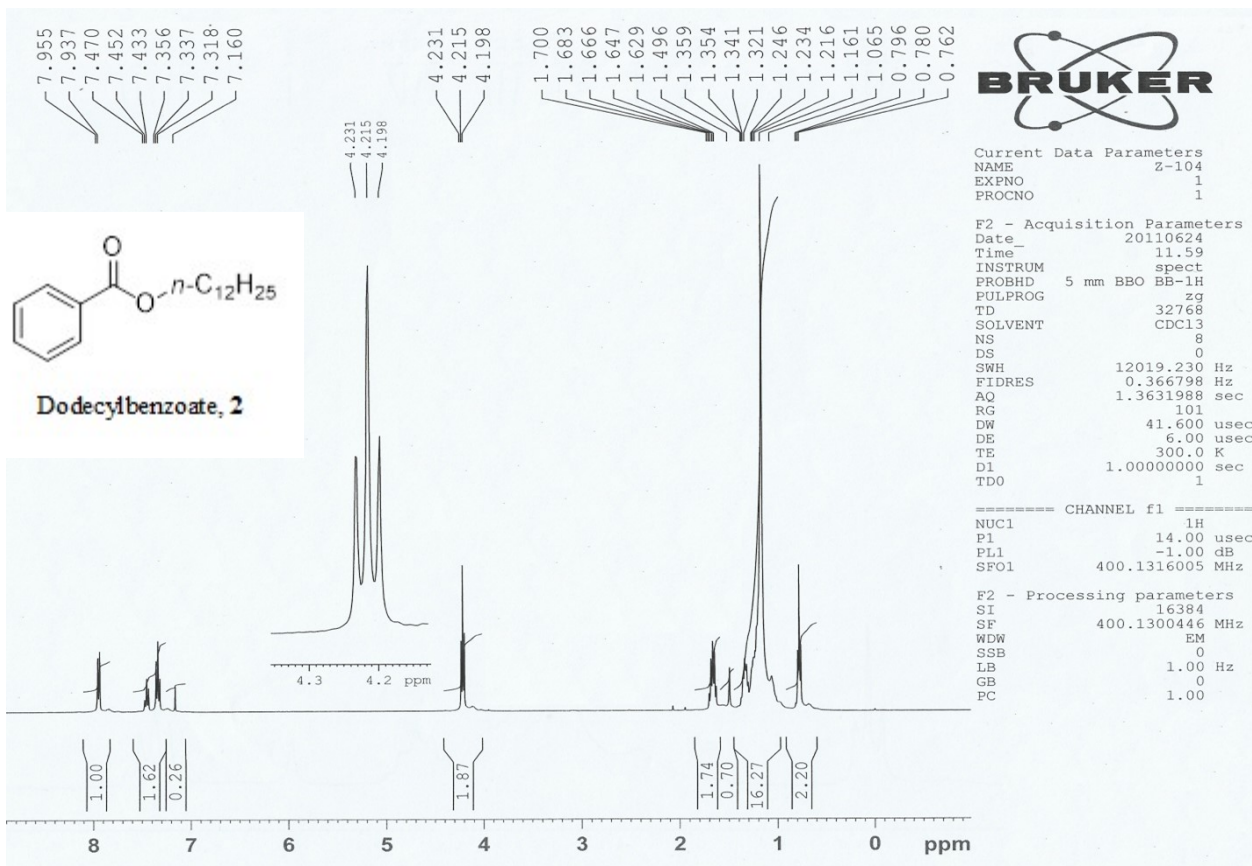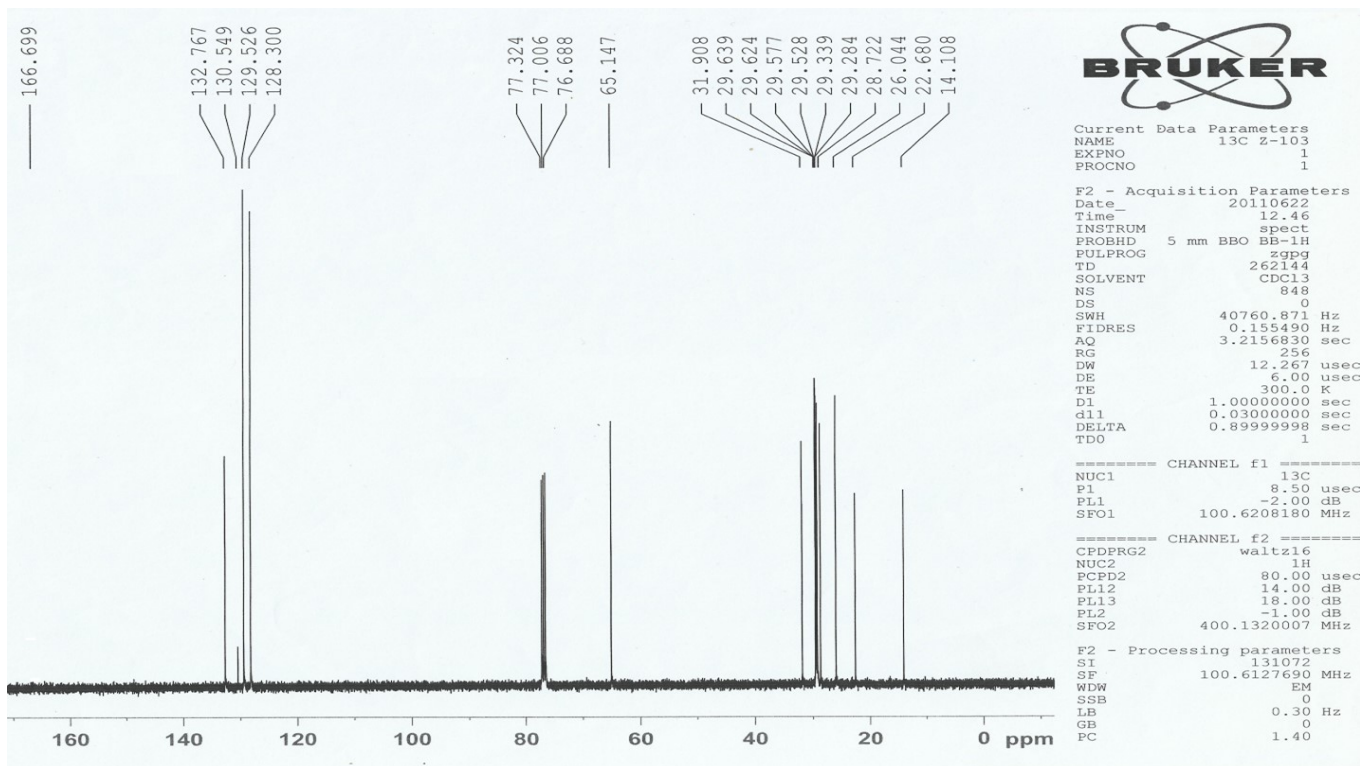

Fig: <sup>1</sup>H & <sup>13</sup>C NMR of Dodecylbenzoate, 2

1H EN1, CDCl3, 28/05/15, SAIF, NEHU

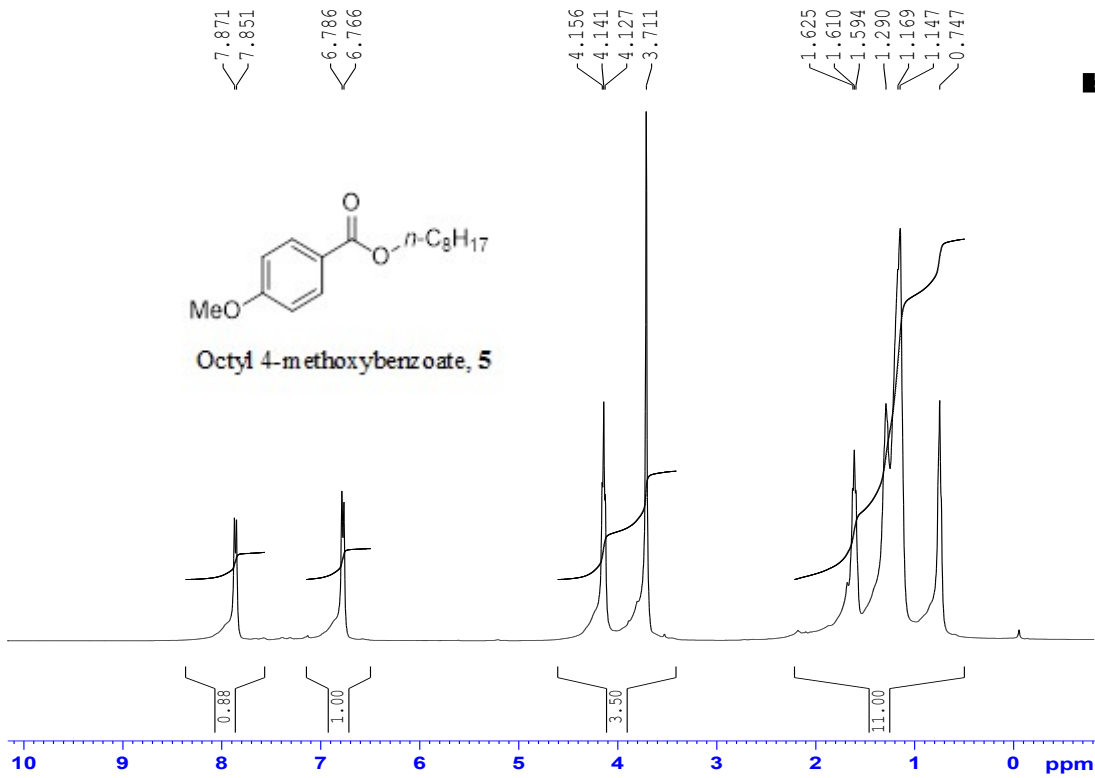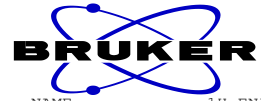

```
NAME 1H EN1
EXPNO 1
PROCNO 1
Date_ 20150528
Time_ 10.23
INSTRUM spect
PROBHD 5 mm BBO BB-1H
PULPROG zg
TD 32768
SOLVENT CDCl3
NS 16
DS 0
SWH 20000.000 Hz
FIDRES 0.610352 Hz
AQ 0.8192500 sec
RG 28.5
DW 25.000 usec
DE 6.00 usec
TE 300.0 K
D1 1.00000000 sec
TDO 1
```

```
===== CHANNEL f1 =====
NUC1 1H
P1 11.50 usec
PL1 -1.00 dB
SFO1 400.1310341 MHz
SI 16394
SF 400.1300552 MHz
WDW EM
SSB 0
LB 1.00 Hz
GB 0
PC 1.00
```

13C EN1, CDCl3, 28/05/15, SAIF, NEHU

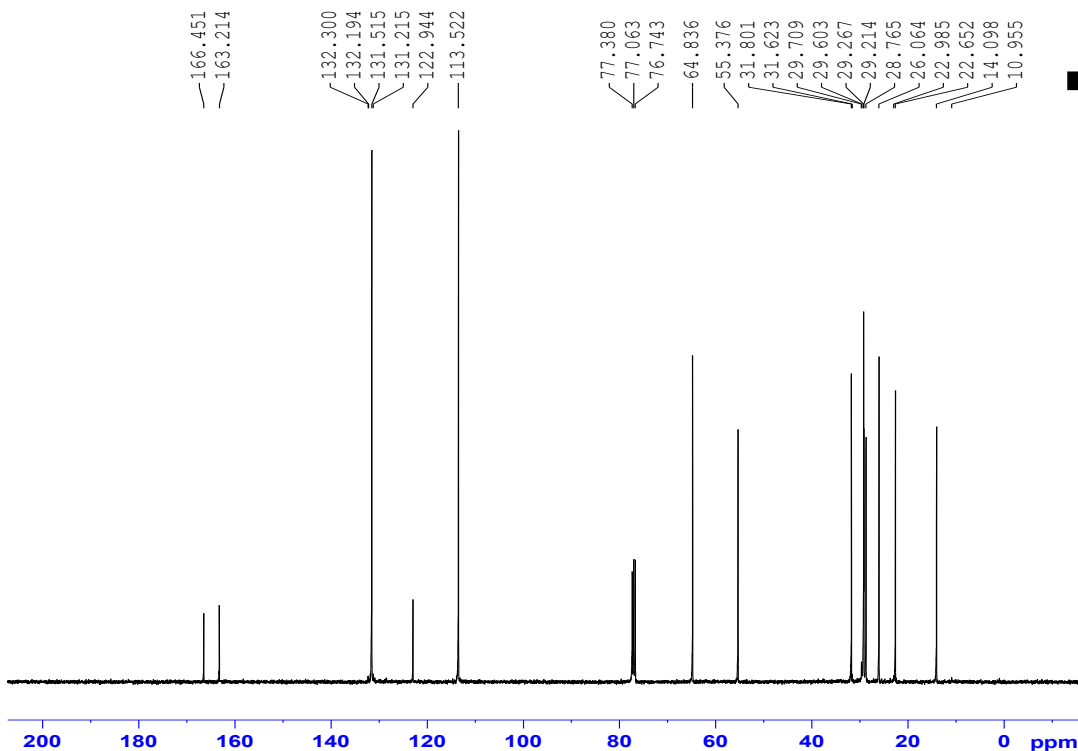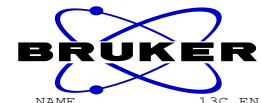

```
NAME 13C EN1
EXPNO 1
PROCNO 1
Date_ 20150528
Time_ 11.39
INSTRUM spect
PROBHD 5 mm BBO BB-1H
PULPROG zgpg
TD 66560
SOLVENT CDCl3
NS 940
DS 0
SWH 40760.871 Hz
FIDRES 0.612393 Hz
AQ 0.8165193 sec
RG 256
DW 12.267 usec
DE 6.00 usec
TE 300.0 K
D1 4.00000000 sec
D11 0.03000000 sec
TDO 1
```

```
===== CHANNEL f1 =====
NUC1 13C
P1 7.00 usec
PL1 0.00 dB
SFO1 100.6208180 MHz

===== CHANNEL f2 =====
CPDPRG2 waltz16
NUC2 1H
PCPD2 80.00 usec
PL2 -1.00 dB
PL12 16.00 dB
PL13 20.00 dB
SFO2 400.1320007 MHz
SI 32768
SF 100.6127690 MHz
WDW EM
SSB 0
LB 0.30 Hz
GB 0
PC 1.40
```

Fig: <sup>1</sup>H & <sup>13</sup>C NMR of Octyl 4-methoxybenzoate . 5

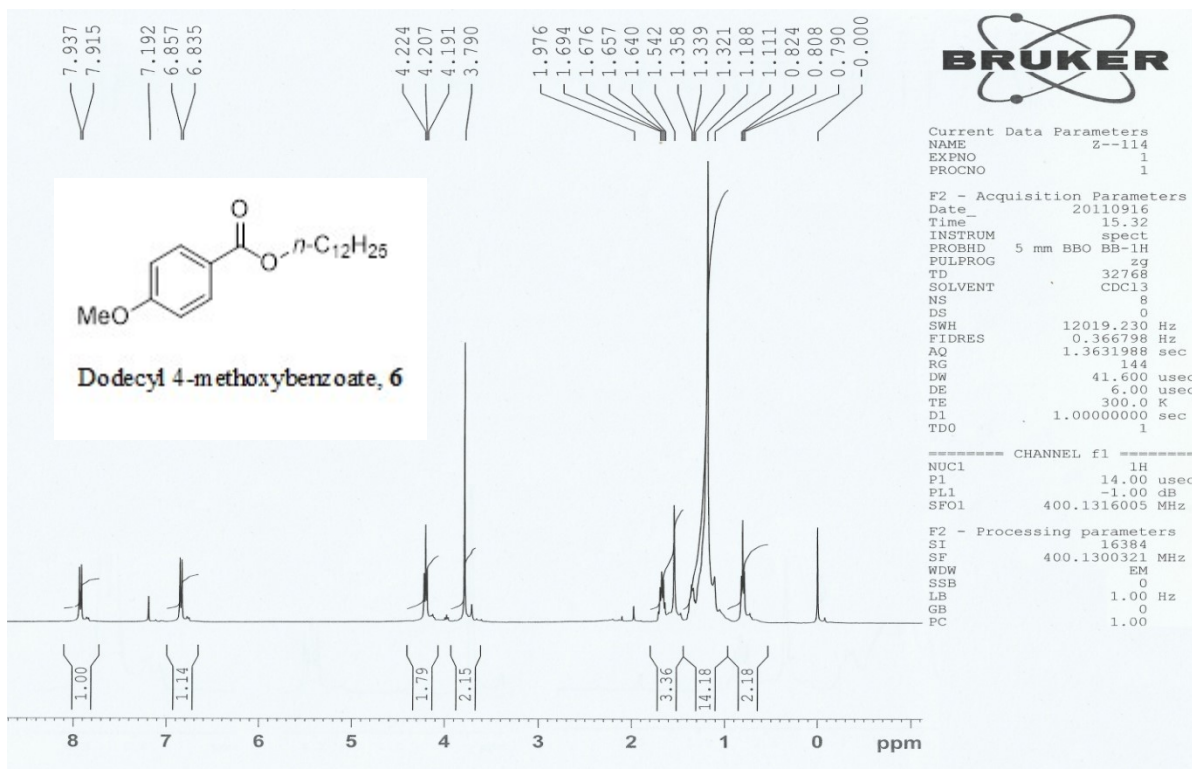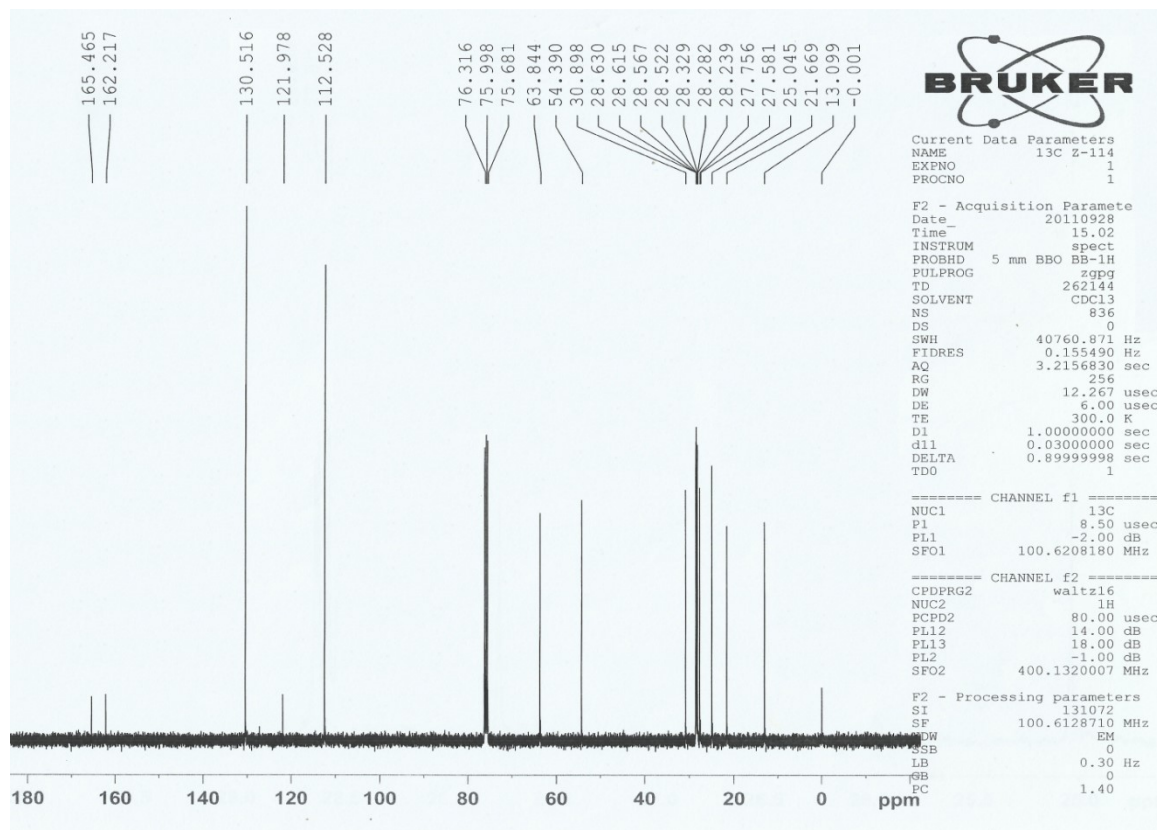

Fig: <sup>1</sup>H & <sup>13</sup>C NMR of Dodecyl 4-methoxybenzoate, 6

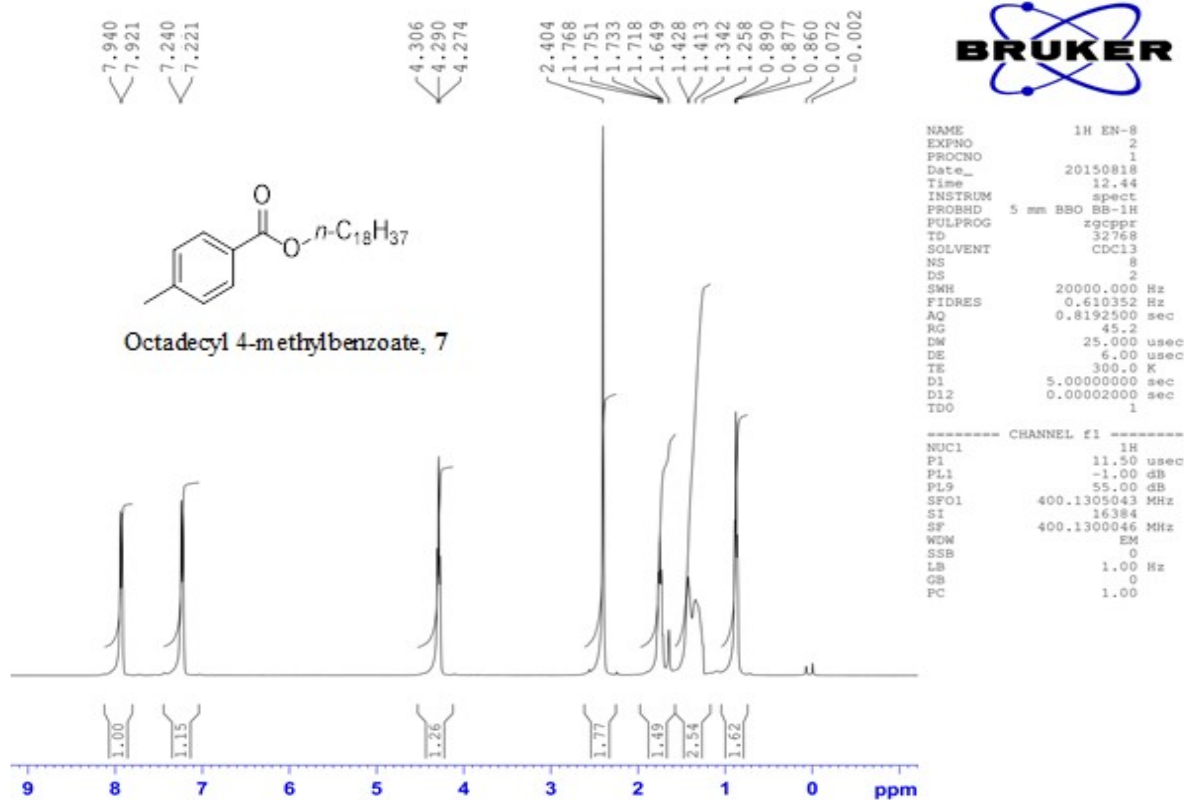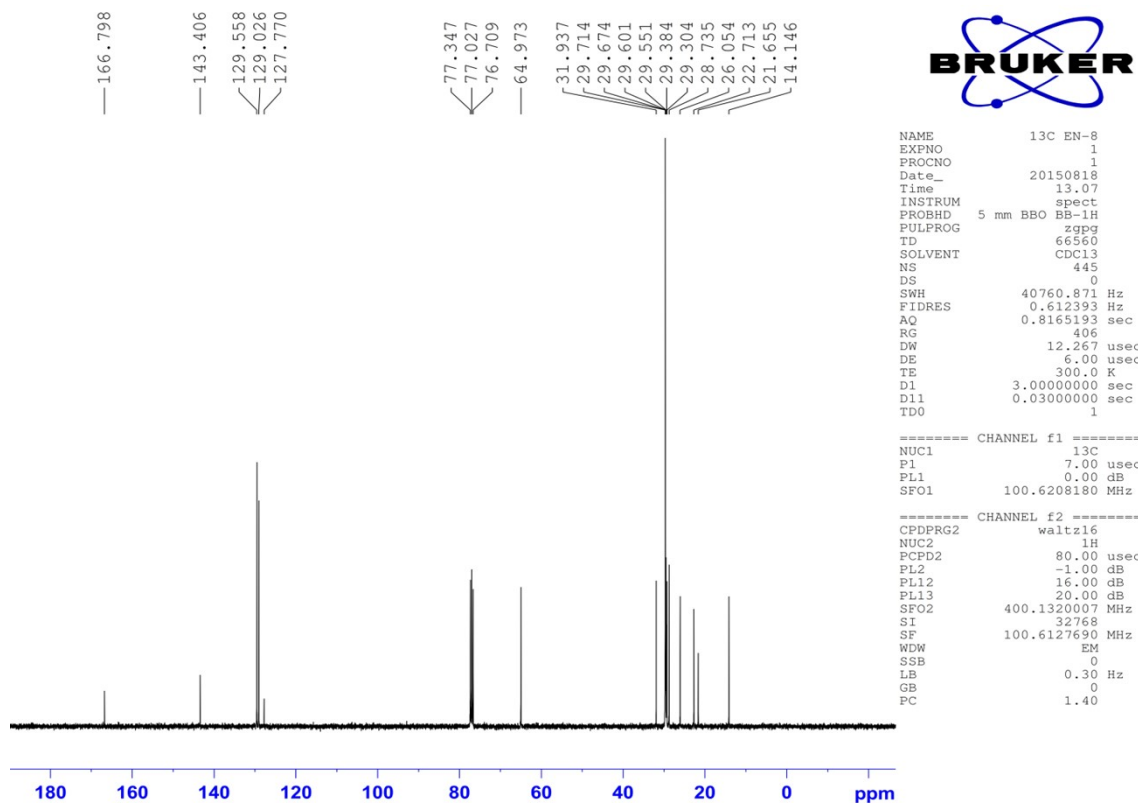

Fig: <sup>1</sup>H & <sup>13</sup>C NMR of Octadecyl 4-methylbenzoate, 7

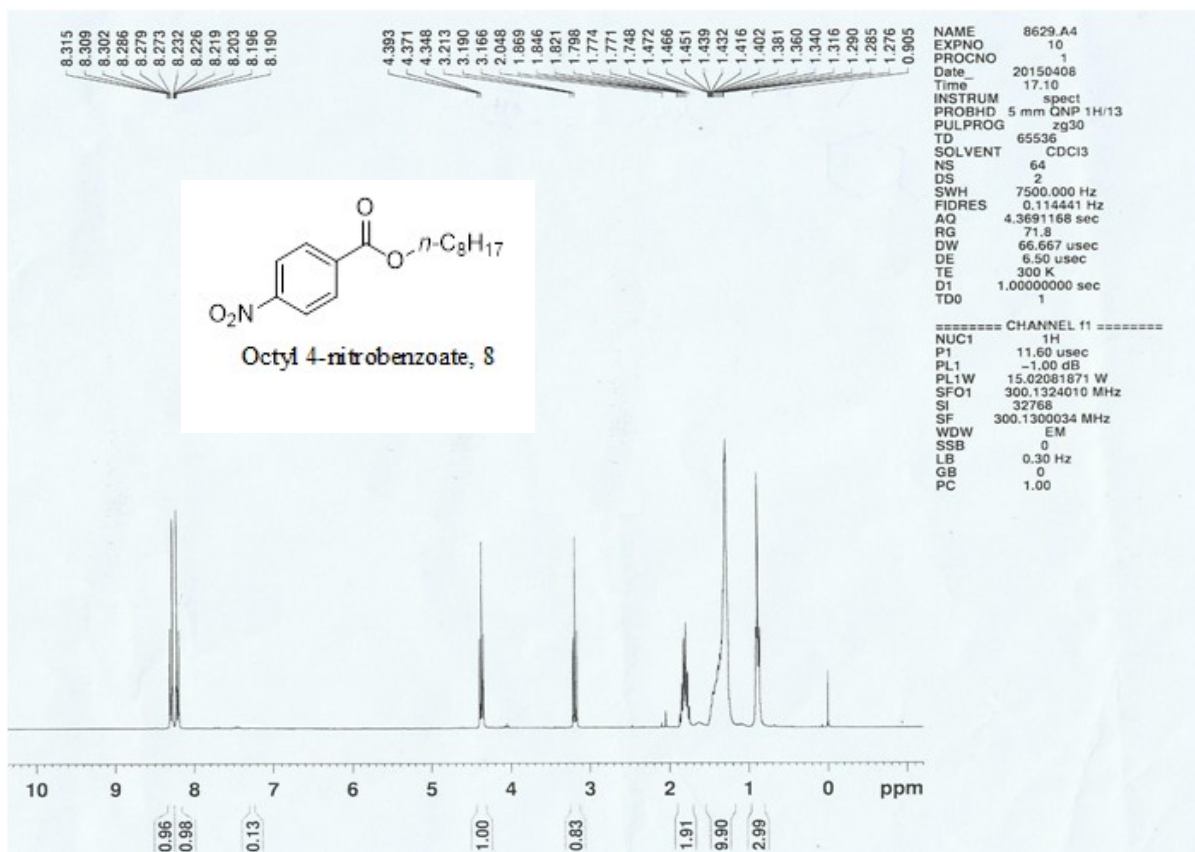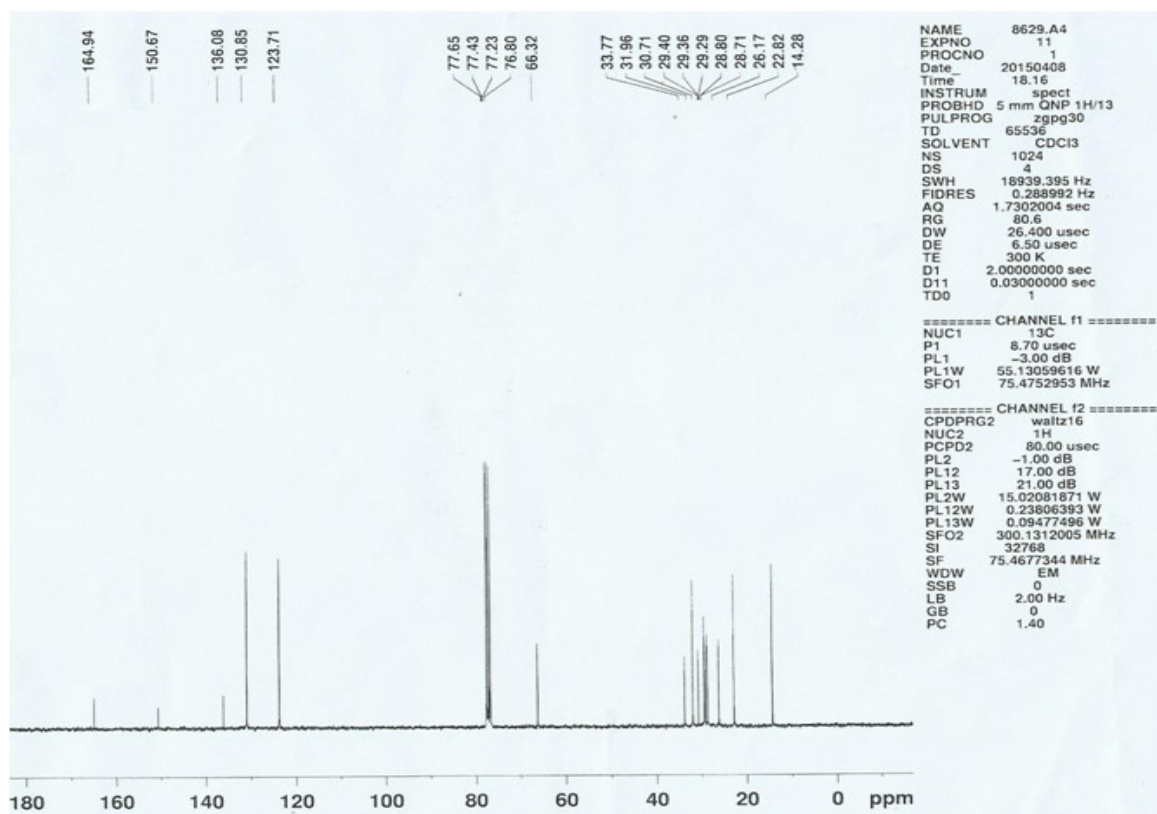

Fig:  $^1\text{H}$  &  $^{13}\text{C}$  NMR of Octyl 4-nitrobenzoate, **8**



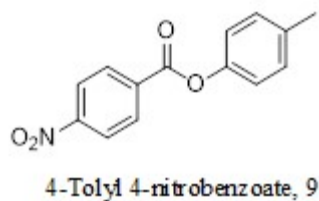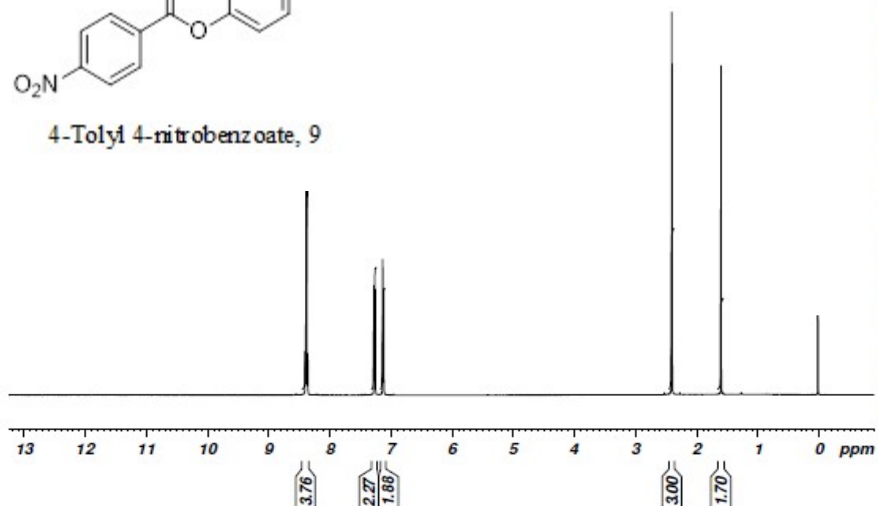

```

Current Data Parameters
NAME      Apr21-2014
EXPNO    1
PROCNO   1

F2 - Acquisition Parameters
Date_    20140420
Time     22.56
INSTRUM  spect
PROBHD   5 mm PABBO BB-
PULPROG  zg30
TD        32768
SOLVENT  CDCl3
NS        32
DS        2
SWH       10330.578 Hz
FIDRES   0.315264 Hz
AQ        1.5860212 sec
RG        203
DW        48.400 usec
DE        6.50 usec
TE        297.0 K
D1        1.00000000 sec
TD0       1

===== CHANNEL f1 =====
NUC1      1H
P1        10.65 usec
PL1       0.00 dB
PL1W      23.53637505 W
SFO1      500.1330885 MHz

F2 - Processing parameters
SI        32768
SF        500.1330000 MHz
WDW       EM
SSB       0
LB        0.30 Hz
GB        0
PC        1.00
  
```

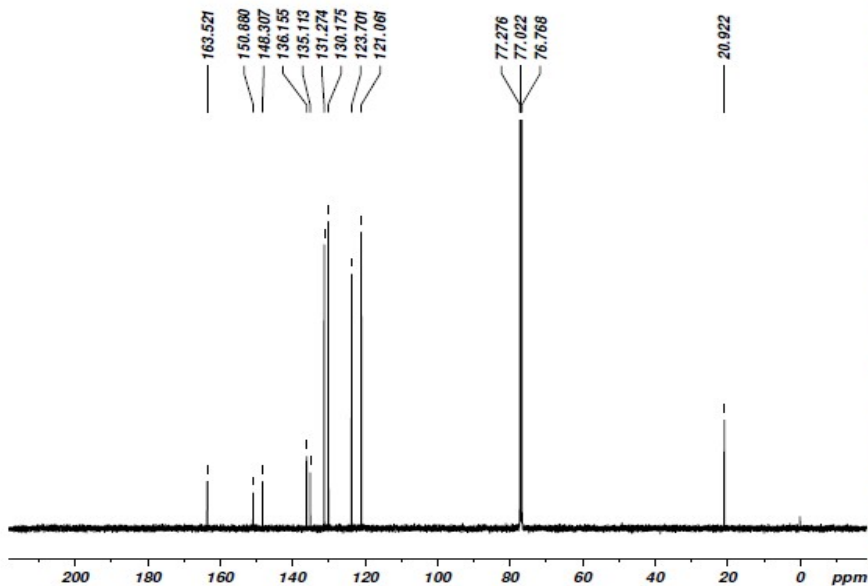

```

Current Data Parameters
NAME      Apr21-2014
EXPNO    2
PROCNO   1

F2 - Acquisition Parameters
Date_    20140420
Time     23.42
INSTRUM  spect
PROBHD   5 mm PABBO BB-
PULPROG  zgpg30
TD        32768
SOLVENT  CDCl3
NS        1024
DS        4
SWH       29761.904 Hz
FIDRES   0.908261 Hz
AQ        0.5505524 sec
RG        203
DW        16.800 usec
DE        6.50 usec
TE        298.9 K
D1        2.00000000 sec
D11      0.03000000 sec
TD0       1

===== CHANNEL f1 =====
NUC1      13C
P1        7.80 usec
PL1       0.00 dB
PL1W      70.83519745 W
SFO1      125.7703643 MHz

===== CHANNEL f2 =====
CPDPRG2  waltz16
NUC2      1H
PCPD2    90.00 usec
PL2       0.00 dB
PL12     17.51 dB
PL13     18.00 dB
PL2W     23.53637505 W
PL12W    0.41757989 W
PL13W    0.37302643 W
SFO2     500.1320005 MHz

F2 - Processing parameters
SI        32768
SF        125.7577890 MHz
WDW       EM
SSB       0
LB        1.00 Hz
GB        0
PC        1.40
  
```

Fig:  $^1\text{H}$  &  $^{13}\text{C}$  NMR of 4-Tolyl 4-nitrobenzoate, 9

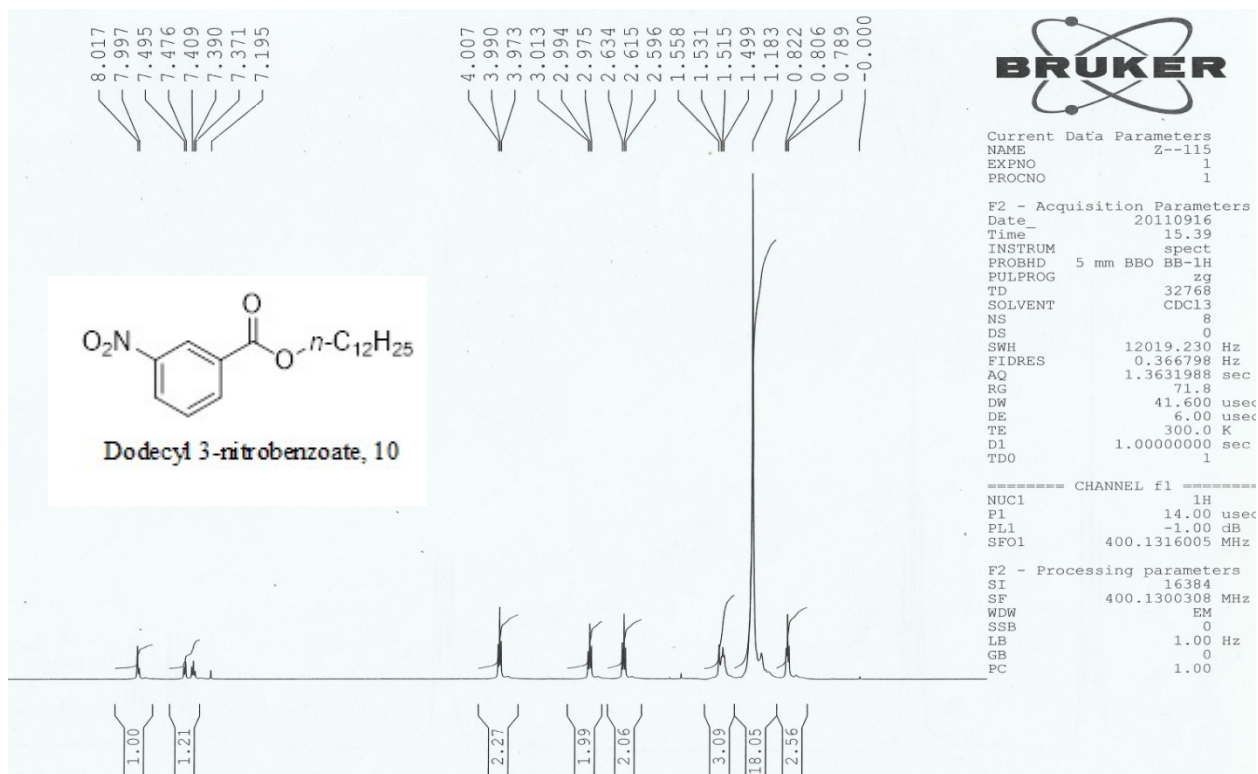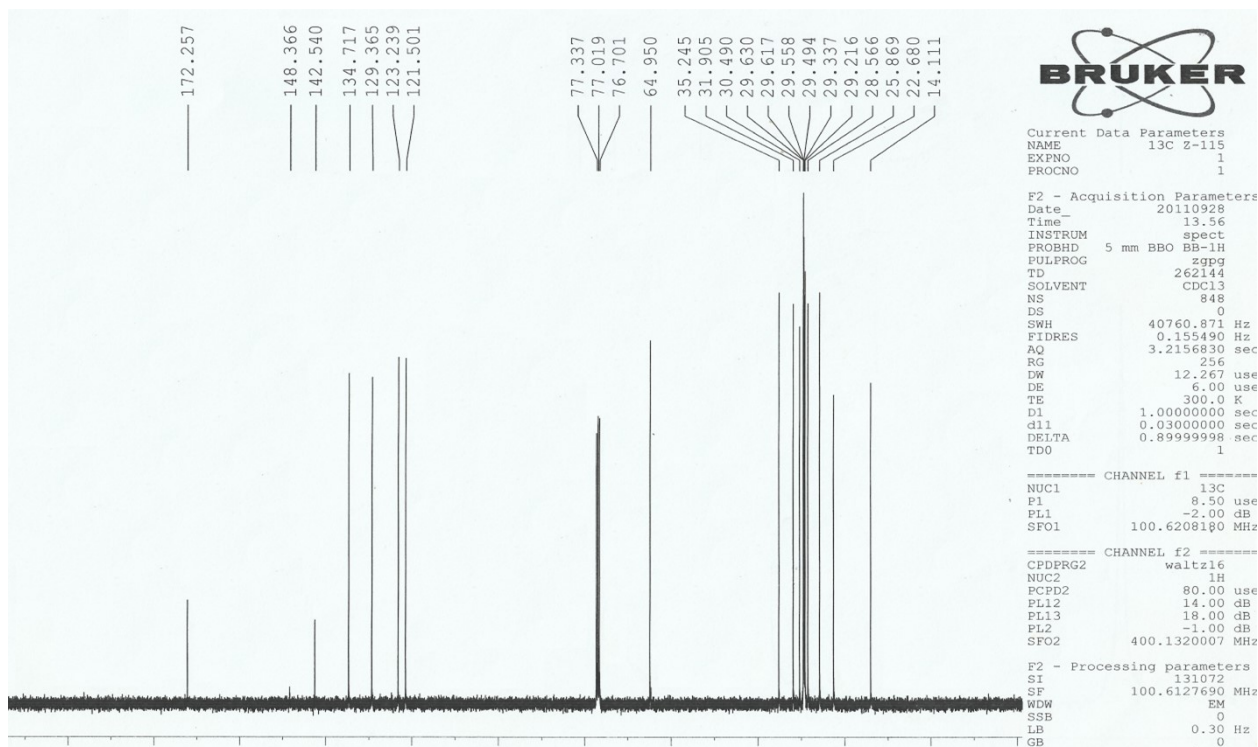

Fig: <sup>1</sup>H & <sup>13</sup>C NMR of Dodecyl 3-nitrobenzoate, 10

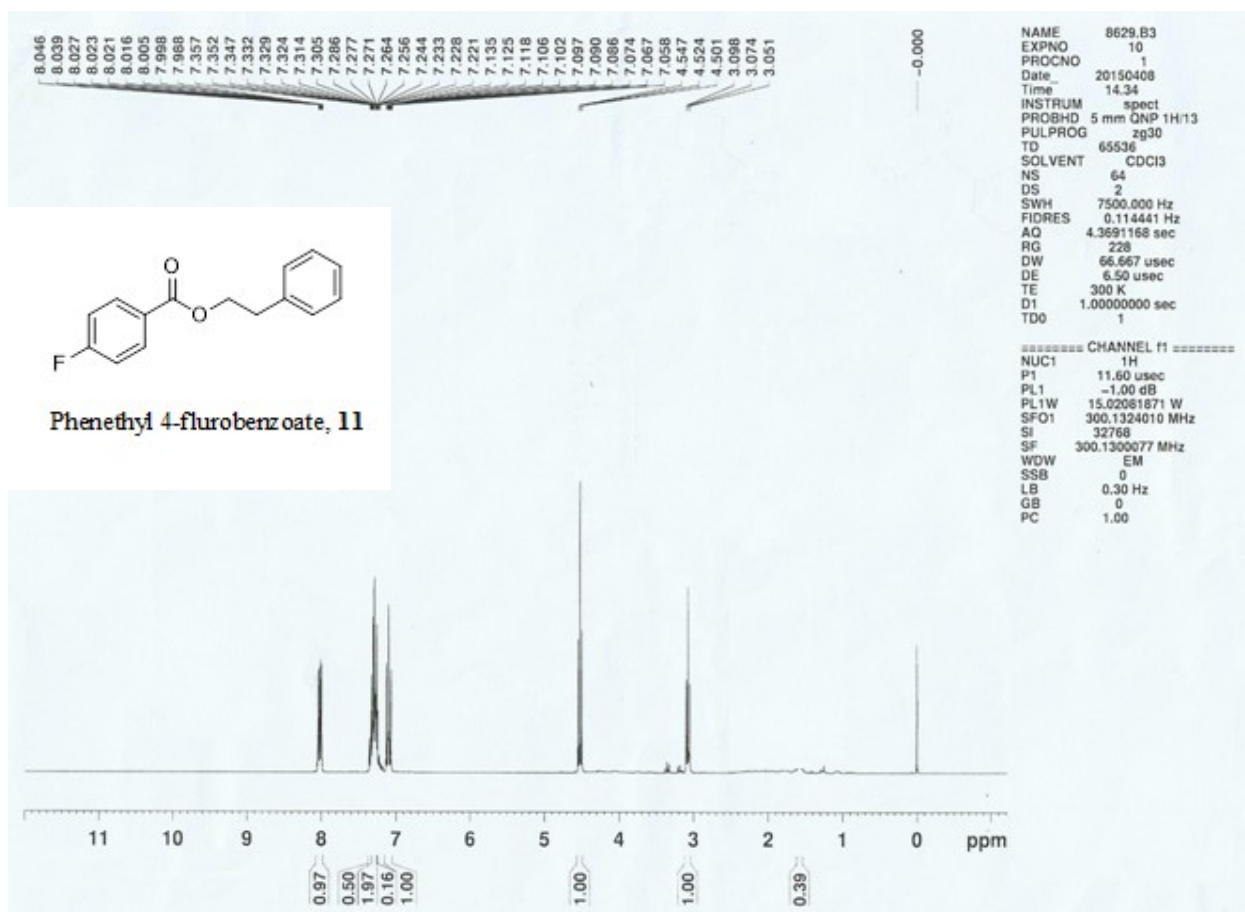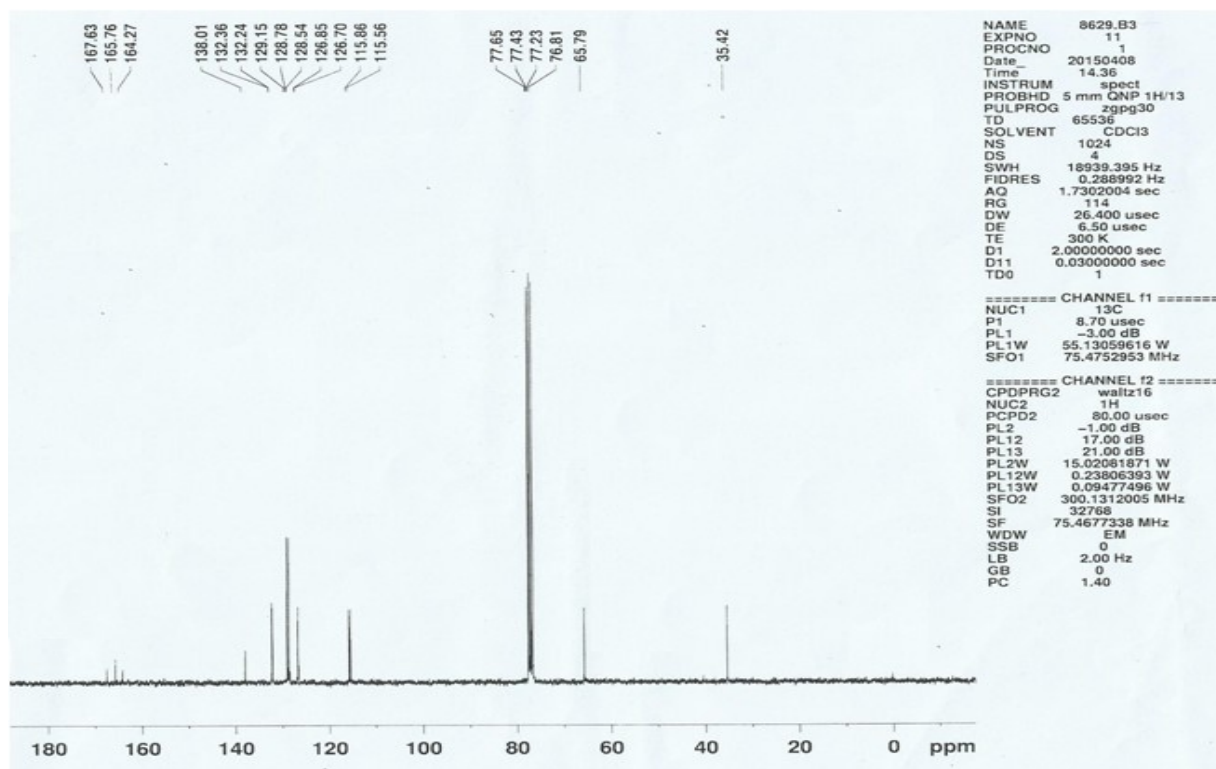

Fig: <sup>1</sup>H & <sup>13</sup>C NMR of Phenethyl 4-fluorobenzoate, 11

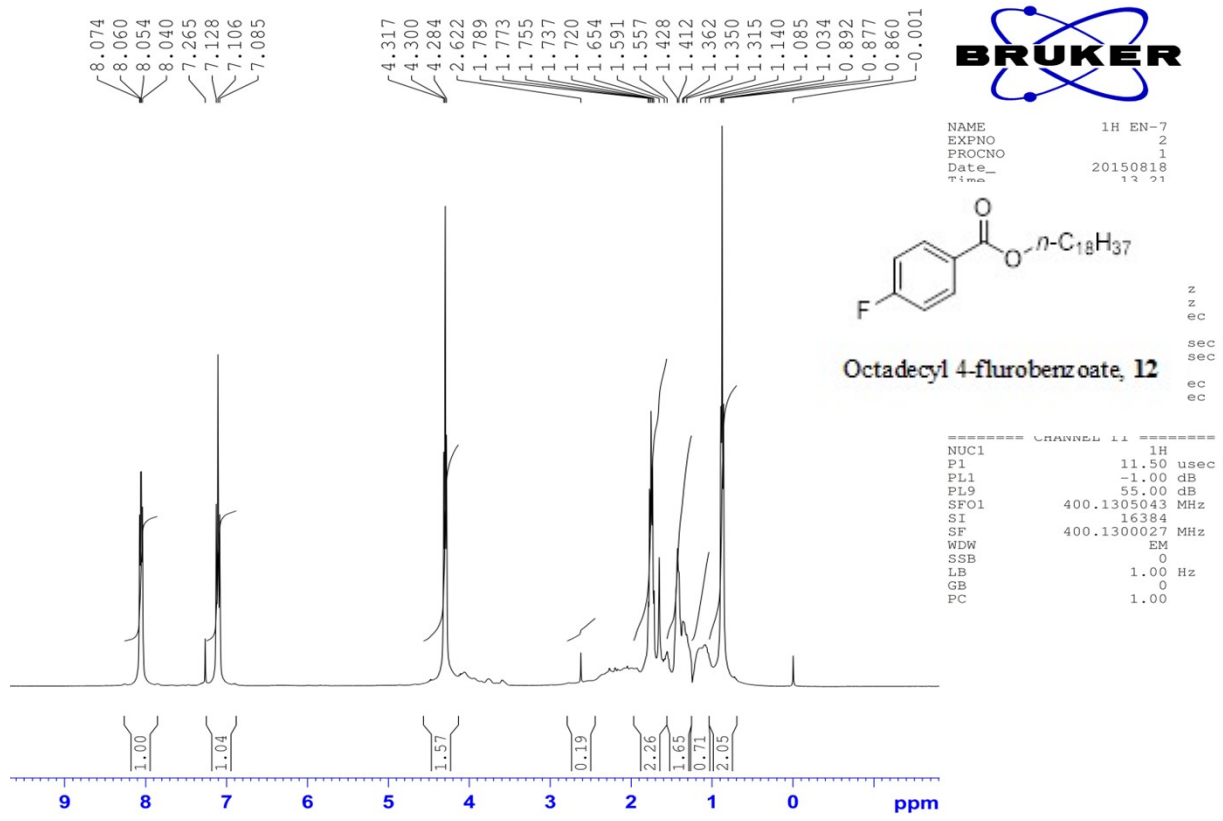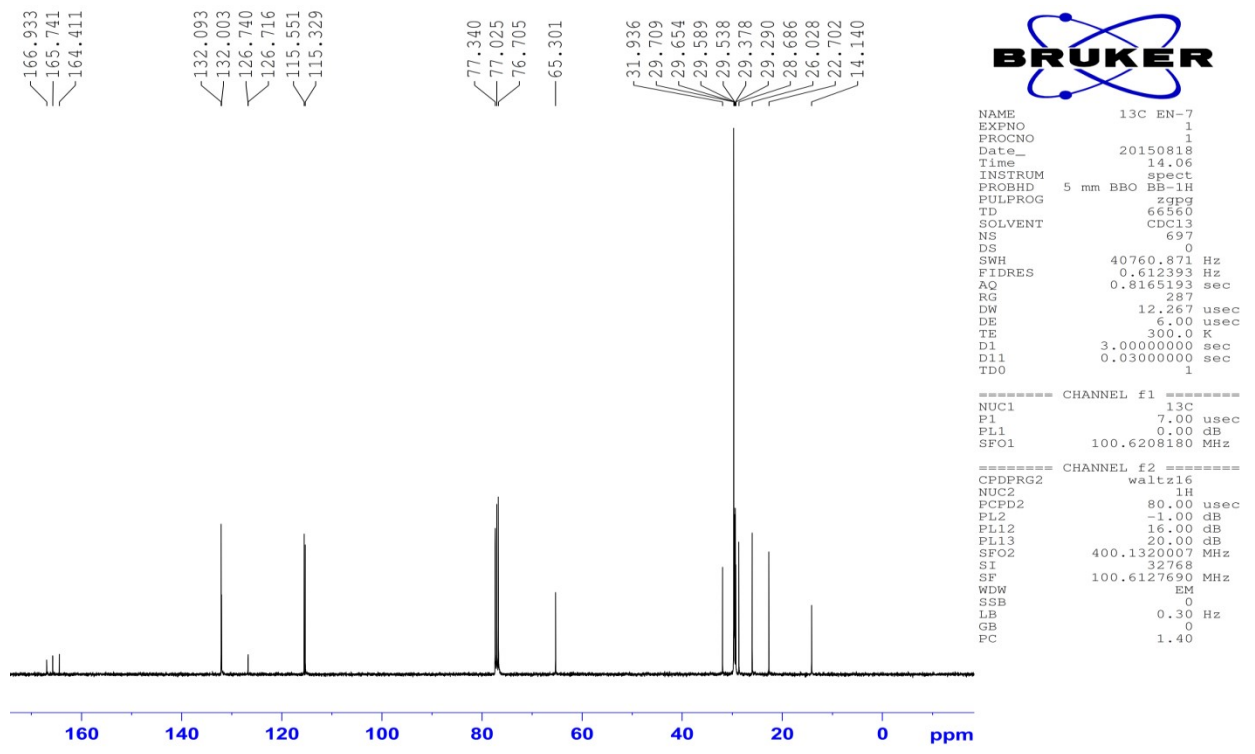

Fig: <sup>1</sup>H & <sup>13</sup>C NMR of Octadecyl 4- fluorobenzoate, **12**

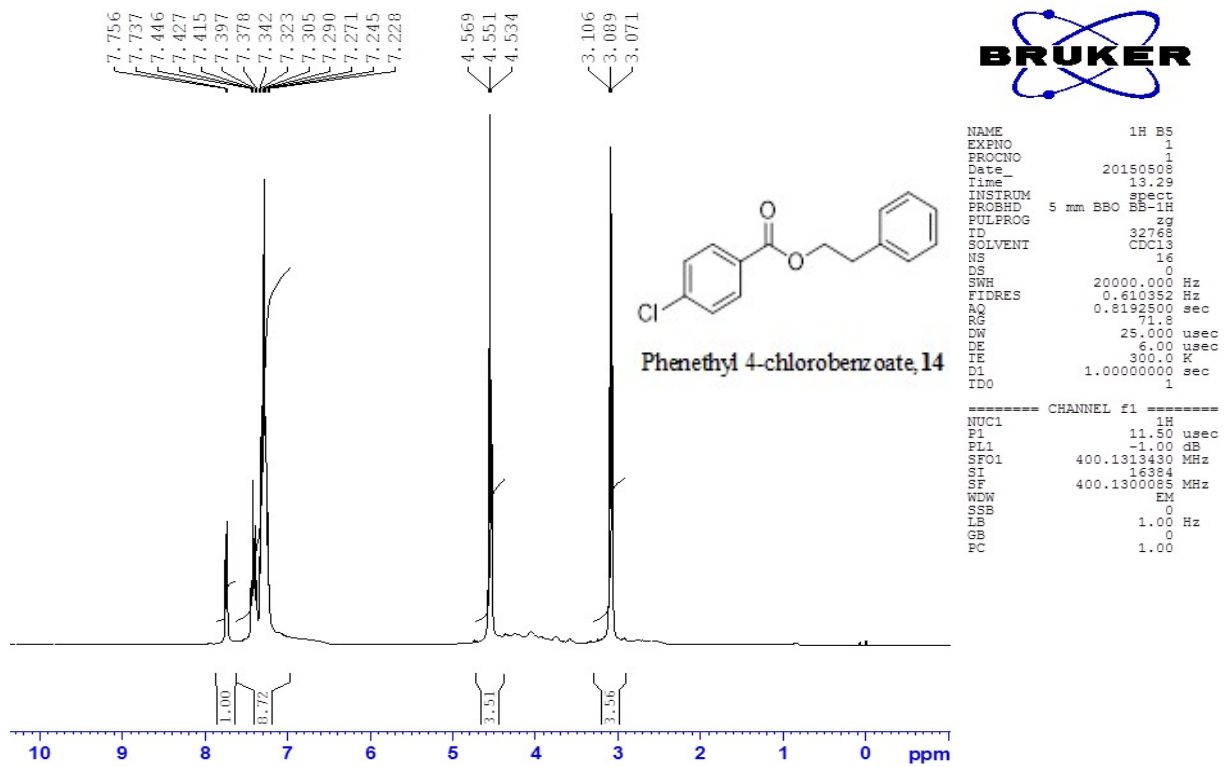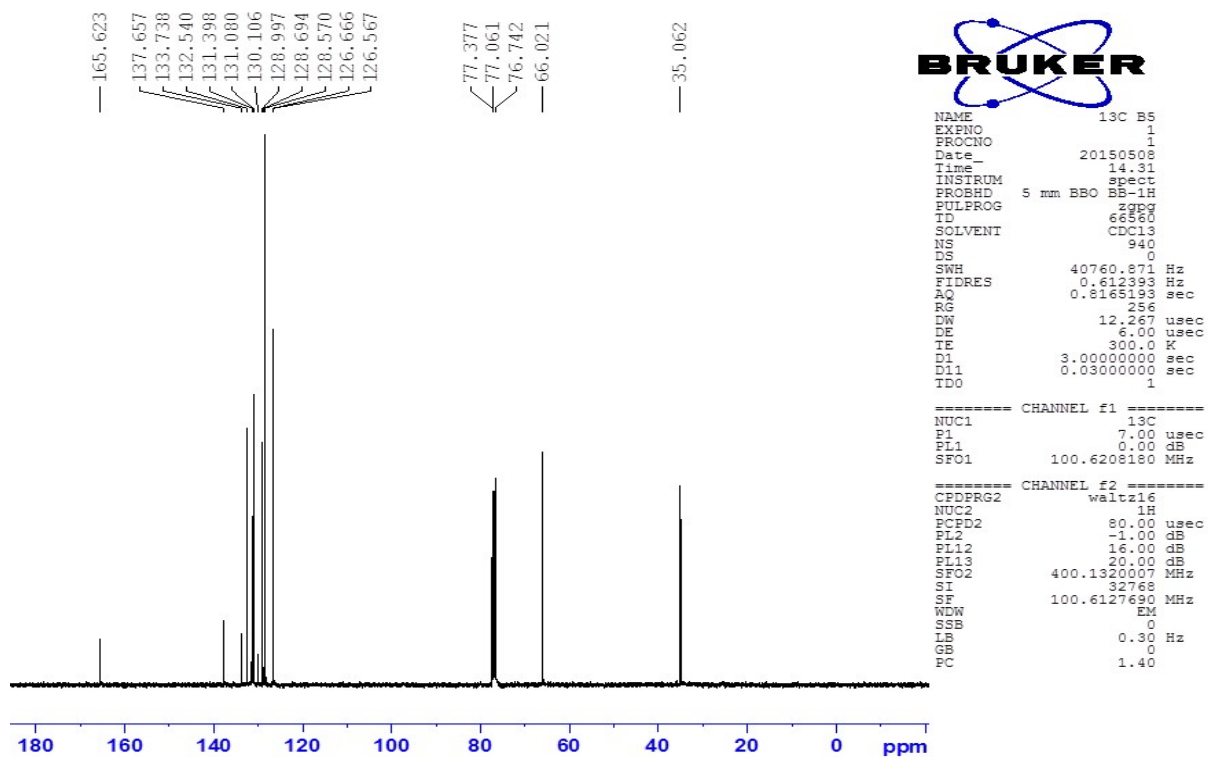

Fig: <sup>1</sup>H & <sup>13</sup>C NMR of Phenethyl 4-chlorobenzoate, 14

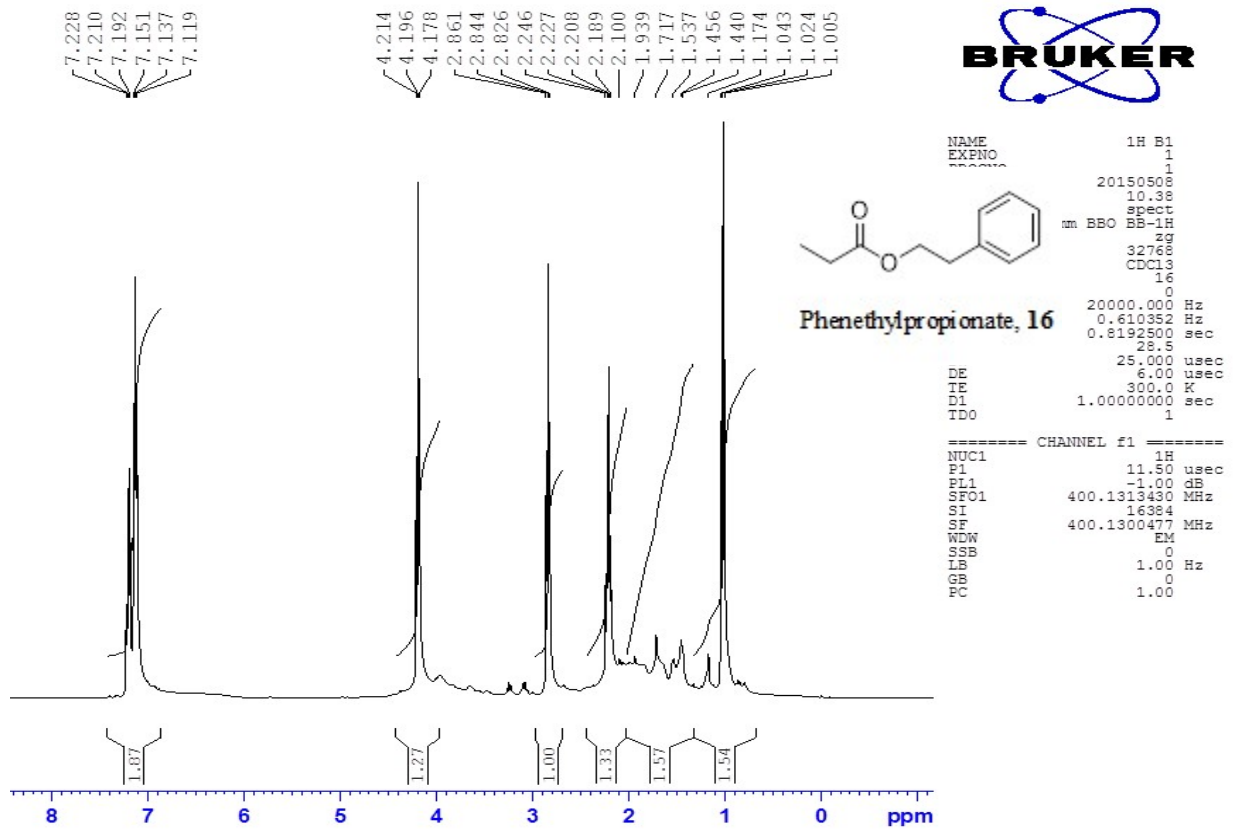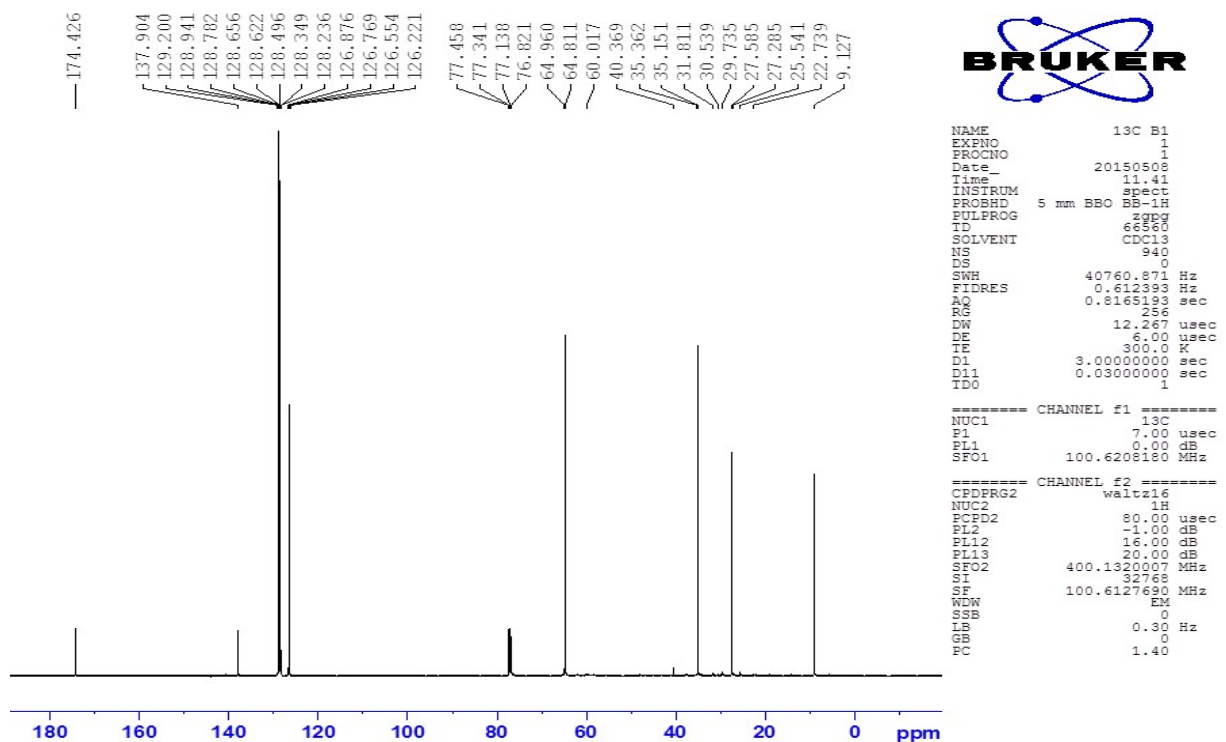

Fig: <sup>1</sup>H & <sup>13</sup>C NMR of Phenethylpropionate, 16

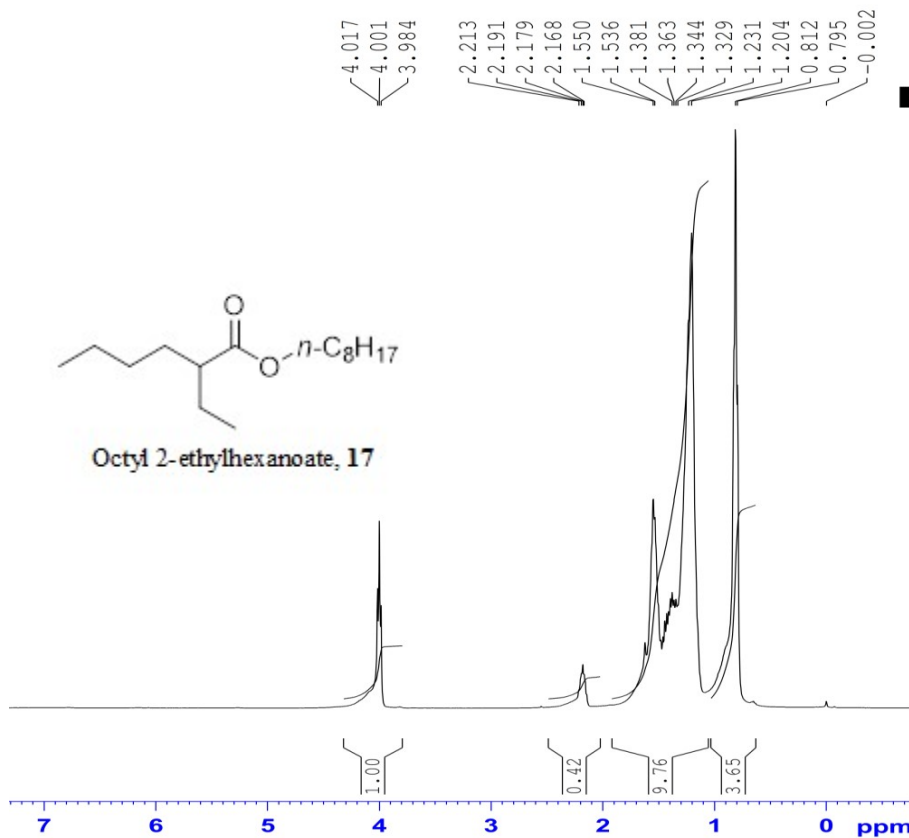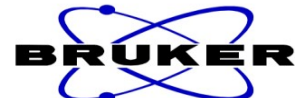

```

NAME          1H EN2
EXPNO         1
PROCNO        1
Date_         20150528
Time         13.11
INSTRUM       spect
PROBHD        5 mm BBO BB-1H
PULPROG       zgpg
TD            32768
SOLVENT       CDCl3
NS            16
DS            0
SWH           20000.000 Hz
FIDRES        0.610352 Hz
AQ            0.8192500 sec
RG            23.5
DW            25.000 usec
DE            6.00 usec
TE            300.0 K
D1            1.00000000 sec
D11           1
TD0           1

```

```

===== CHANNEL f1 =====
NUC1          1H
P1            11.50 usec
PL1           -1.00 dB
SFO1          400.1310341 MHz
SI            16384
SF            400.1300269 MHz
WDW           EM
SSB           0
LB            1.00 Hz
GB            0
PC            1.00

```

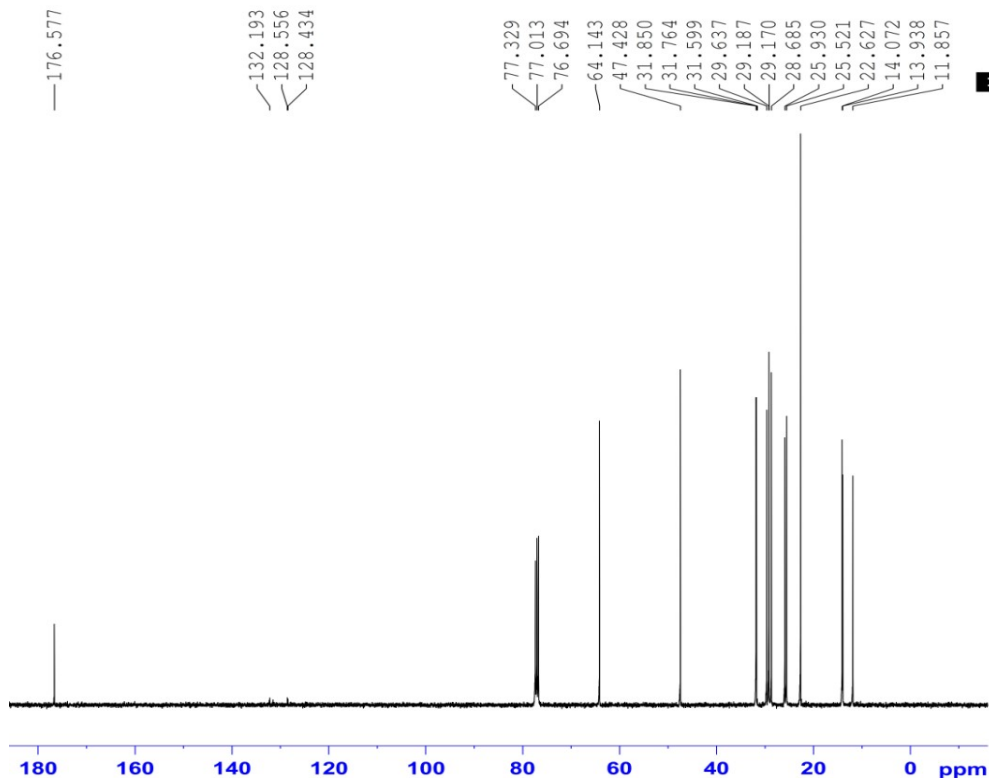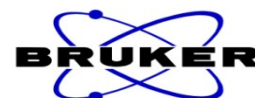

```

NAME          13C EN2
EXPNO         1
PROCNO        1
Date_         20150528
Time         14.28
INSTRUM       spect
PROBHD        5 mm BBO BB-1H
PULPROG       zgpg
TD            66560
SOLVENT       CDCl3
NS            940
DS            0
SWH           40760.871 Hz
FIDRES        0.612393 Hz
AQ            0.8165193 sec
RG            256
DW            12.267 usec
DE            6.00 usec
TE            300.0 K
D1            4.00000000 sec
D11           0.03000000 sec
TD0           1

```

```

===== CHANNEL f1 =====
NUC1          13C
P1            7.00 usec
PL1           0.00 dB
SFO1          100.6208180 MHz

```

```

===== CHANNEL f2 =====
CPDPRG2       waltz16
NUC2          1H
PCPD2         80.00 usec
PL2           -1.00 dB
PL12          16.00 dB
PL13          20.00 dB
SFO2          400.1320007 MHz
SI            32768
SF            100.6127690 MHz
WDW           EM
SSB           0
LB            0.30 Hz
GB            0
PC            1.40

```

Fig: <sup>1</sup>H & <sup>13</sup>C NMR of Octyl 2-ethylhexanoate, 17

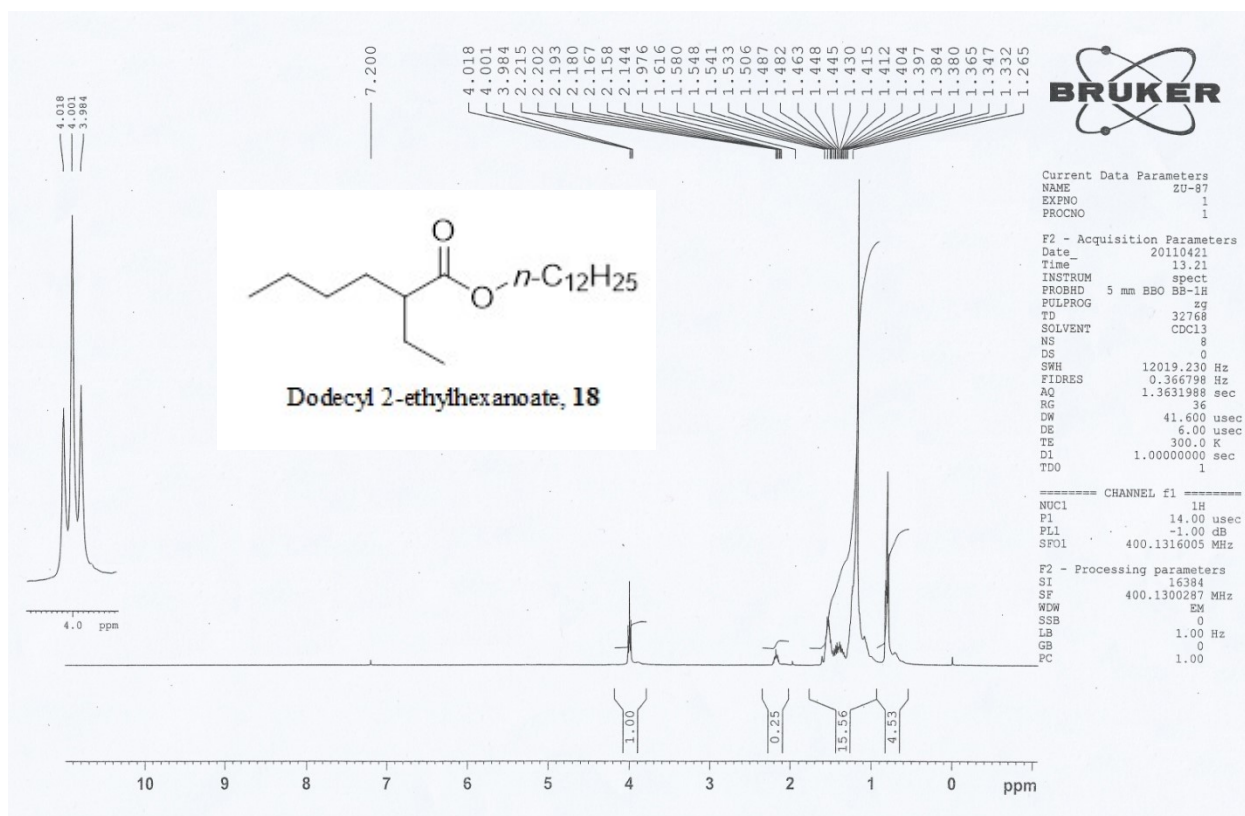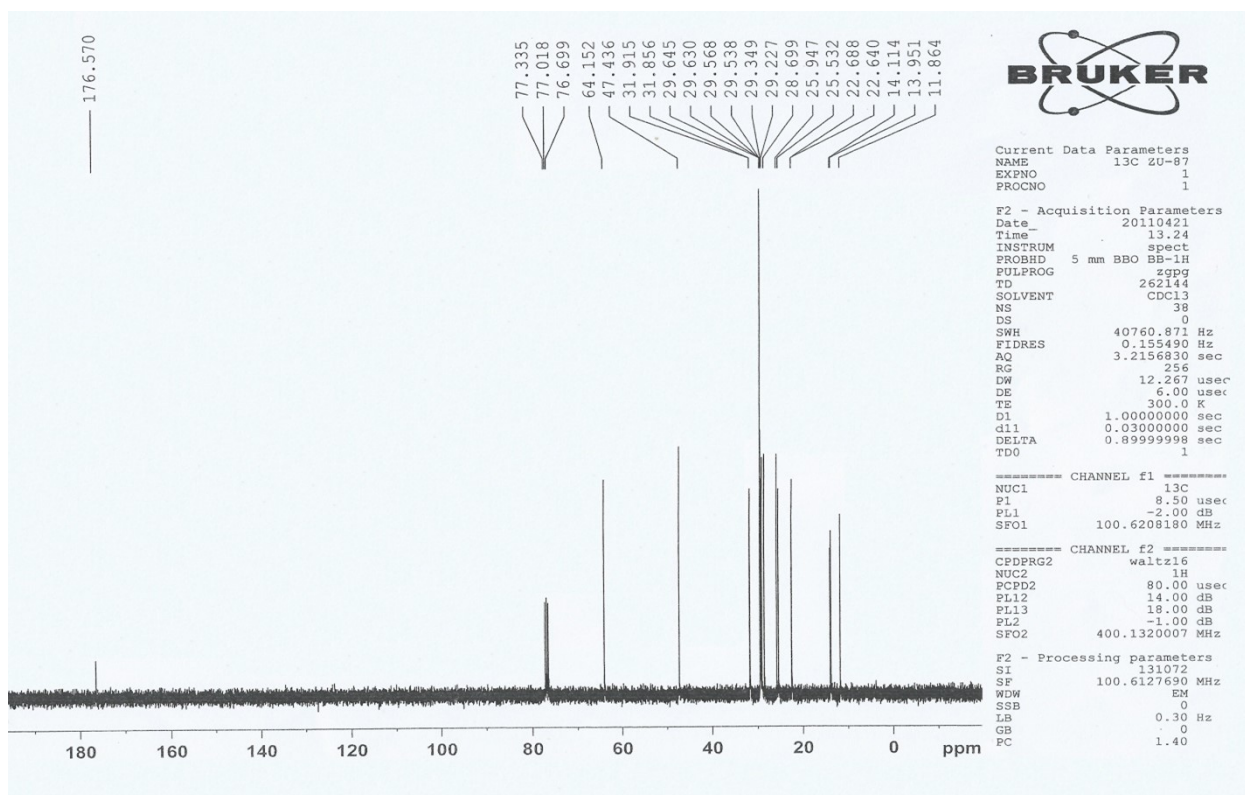

Fig:  $^1\text{H}$  &  $^{13}\text{C}$  NMR of Dodecyl 2-ethylhexanoate, 18



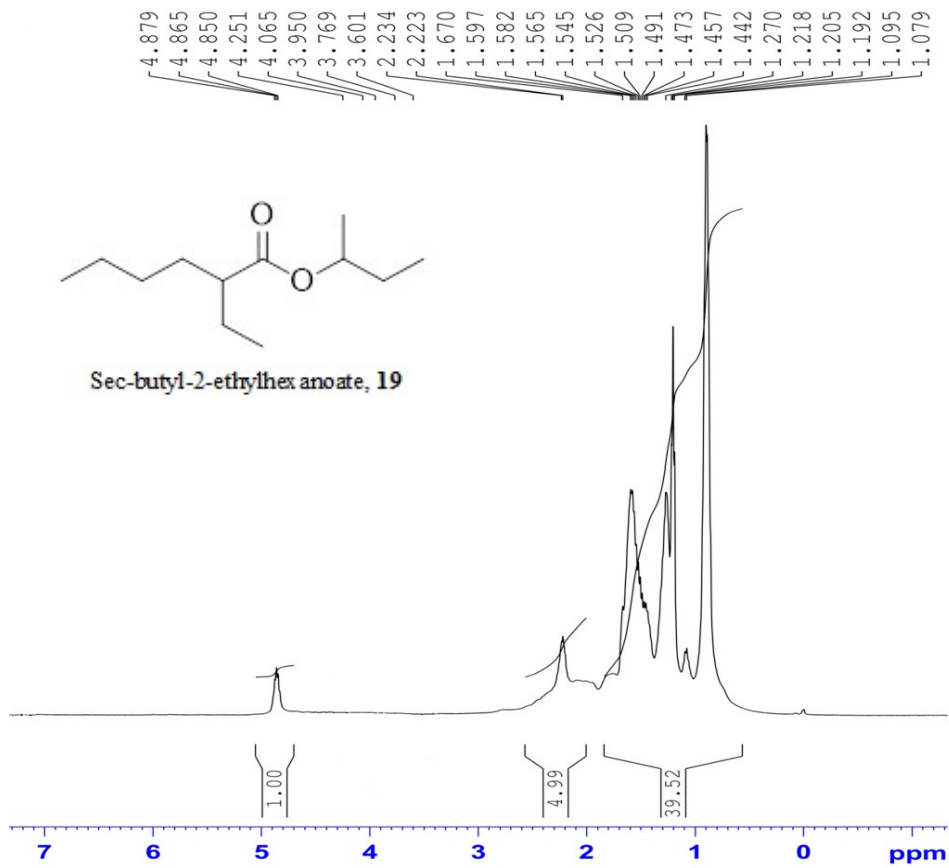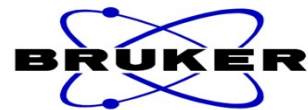

```

NAME          1H EN-6
EXPNO         1
PROCNO        1
Date_         20150818
Time_         15.23
INSTRUM       spect
PROBHD        5 mm BBO BB-1H
PULPROG       zg
TD            32768
SOLVENT       CDCl3
NS            8
DS            0
SWH           20000.000 Hz
FIDRES        0.610352 Hz
AQ            0.8192500 sec
RG            40.3
DW            25.000 usec
DE            6.00 usec
TE            300.0 K
D1            1.00000000 sec
D11           1
TDO           1
  
```

```

===== CHANNEL f1 =====
NUC1          1H
P1            11.50 usec
PL1           -1.00 dB
SFO1         400.1305080 MHz
SI           16384
SF           400.1299977 MHz
WDW           EM
SSB           0
LB            1.00 Hz
GB            0
PC            1.00
  
```

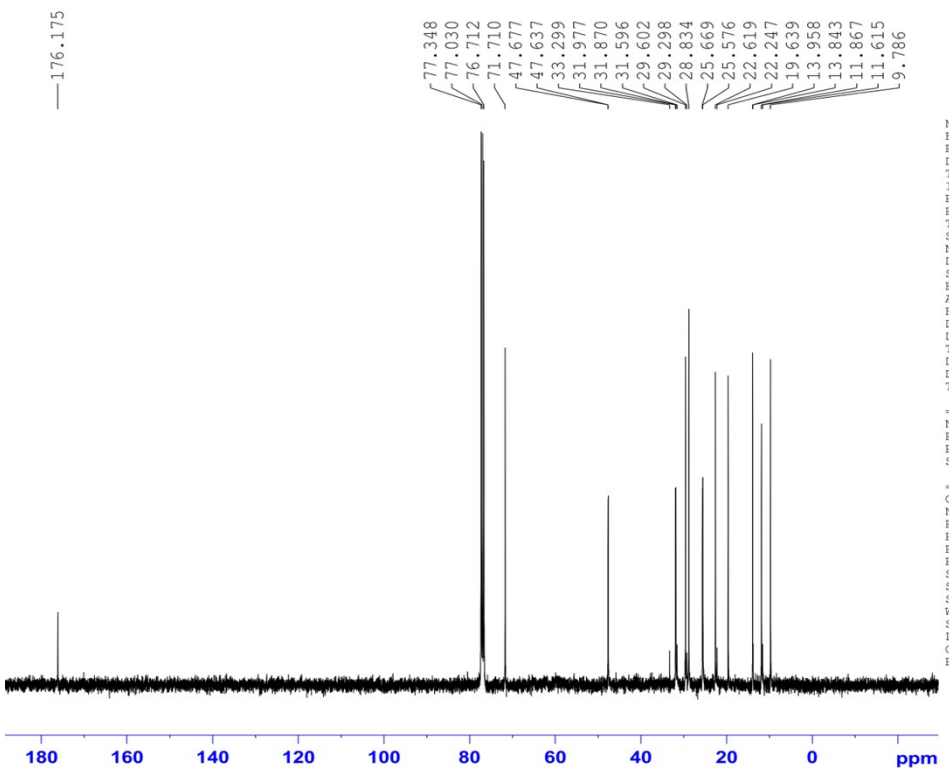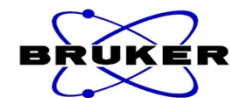

```

NAME          13C EN-6
EXPNO         1
PROCNO        1
Date_         20150818
Time_         16.24
INSTRUM       spect
PROBHD        5 mm BBO BB-1H
PULPROG       zgpgg
TD            66560
SOLVENT       CDCl3
NS            940
DS            0
SWH           40760.871 Hz
FIDRES        0.612393 Hz
AQ            0.8165193 sec
RG            287
DW            12.267 usec
DE            6.00 usec
TE            300.0 K
D1            3.00000000 sec
D11           0.03000000 sec
TDO           1
  
```

```

===== CHANNEL f1 =====
NUC1          13C
P1            7.00 usec
PL1           0.00 dB
SFO1         100.6208180 MHz

===== CHANNEL f2 =====
CPDPRG2       waltz16
NUC2          1H
PCPD2         80.00 usec
PL2           -1.00 dB
PL12          16.00 dB
PL13          20.00 dB
SFO2         400.1320007 MHz
SI           32768
SF           100.6127690 MHz
WDW           EM
SSB           0
LB            0.30 Hz
GB            0
PC            1.40
  
```

Fig: <sup>1</sup>H & <sup>13</sup>C NMR of Sec-butyl-2-ethylhexanoate, 19

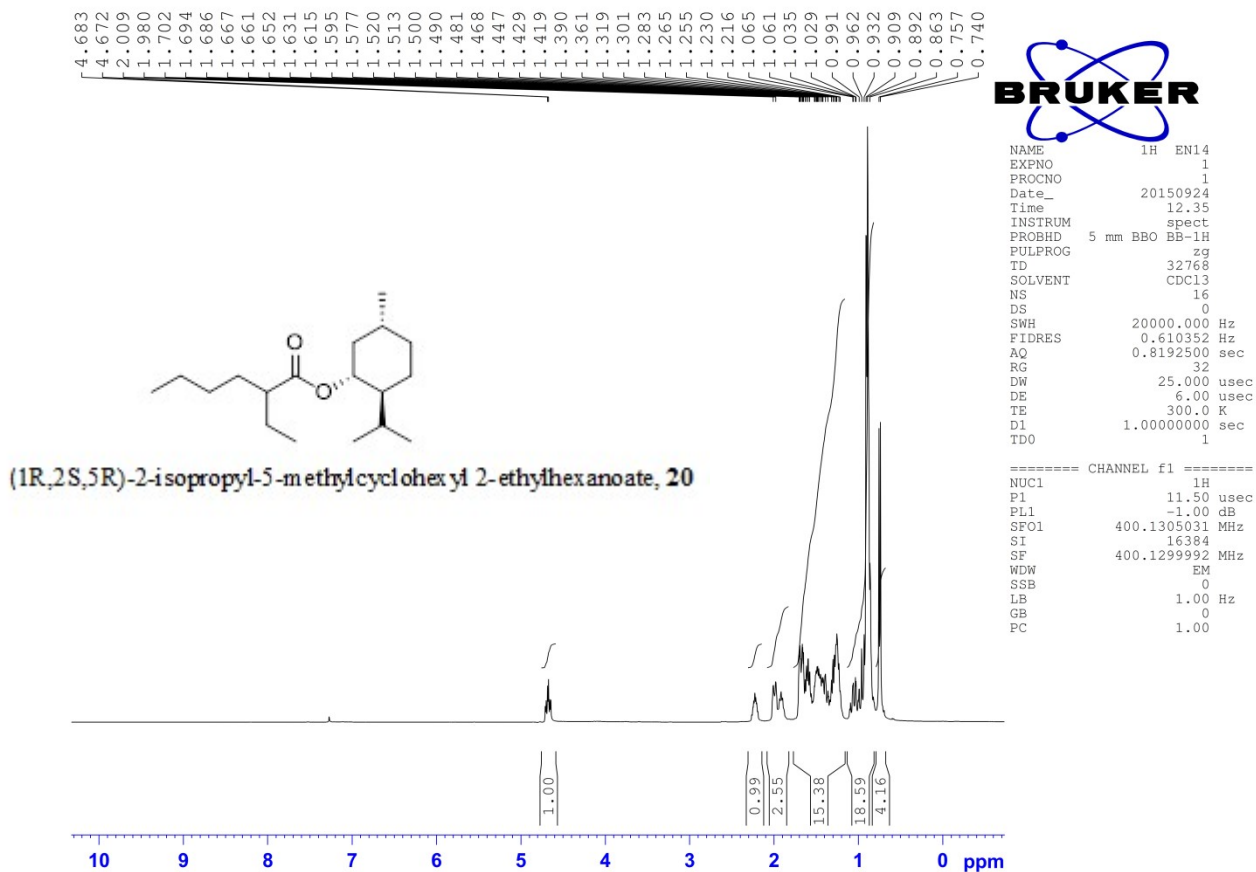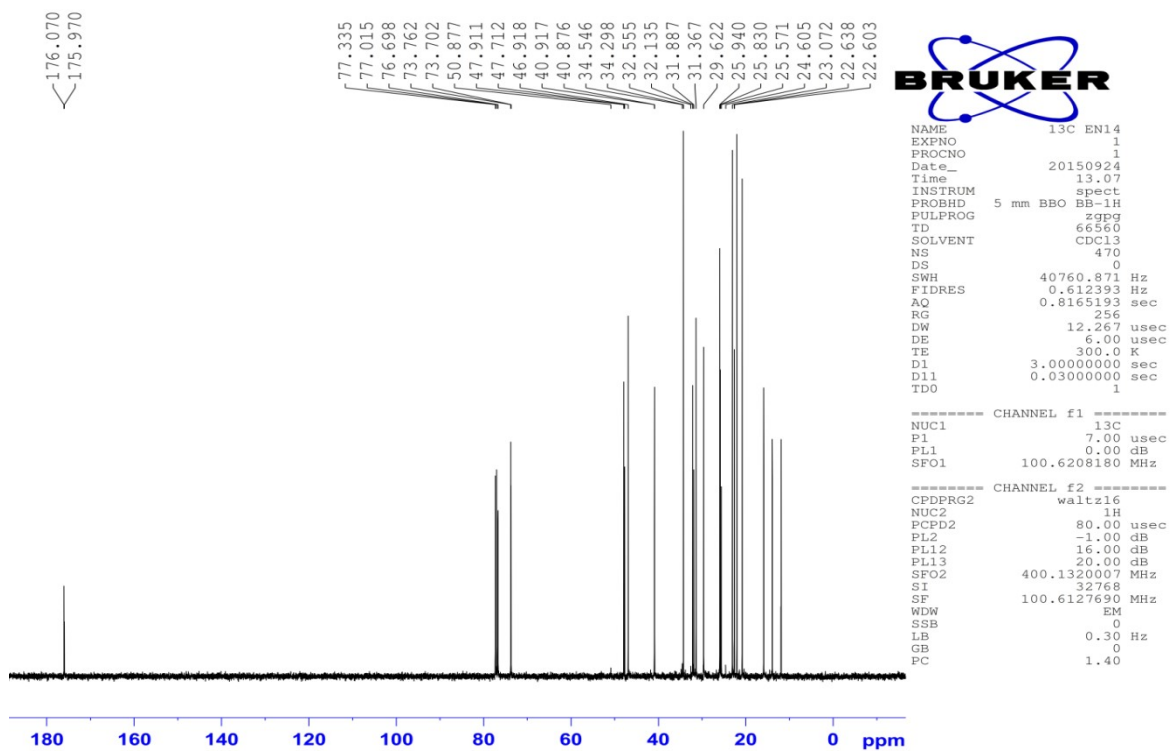

Fig:  $^1\text{H}$  &  $^{13}\text{C}$  NMR of (1R,2S,5R)-2-isopropyl-5-methylcyclohexyl 2-ethylhexanoate, **20**

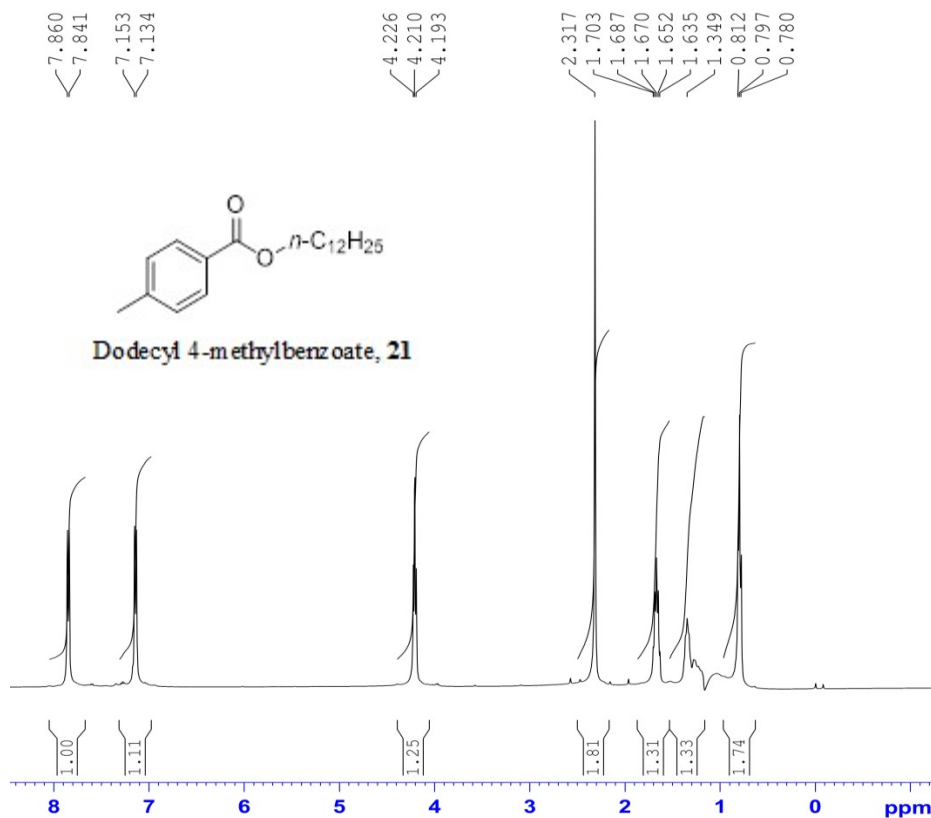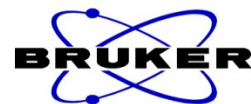

```

NAME          1H EN-4
EXPNO         2
PROCNO        1
Date_         20150818
Time          14.50
INSTRUM       spect
PROBHD        5 mm BBO BB-1H
PULPROG       zgpgpr
TD            32768
SOLVENT       CDCl3
NS            8
DS            2
SWH           20000.000 Hz
FIDRES        0.610352 Hz
AQ            0.8192500 sec
RG            25.4
DW            25.000 usec
DE            6.00 usec
TE            300.0 K
D1            5.00000000 sec
D12           0.00002000 sec
TDO           1
  
```

```

----- CHANNEL f1 -----
NUC1          1H
P1            11.50 usec
PL1           -1.00 dB
PL9           55.00 dB
SFO1          400.1305080 MHz
SI            16384
SF            400.1300381 MHz
WDW           EM
SSB           0
LB            1.00 Hz
GB            0
PC            1.00
  
```

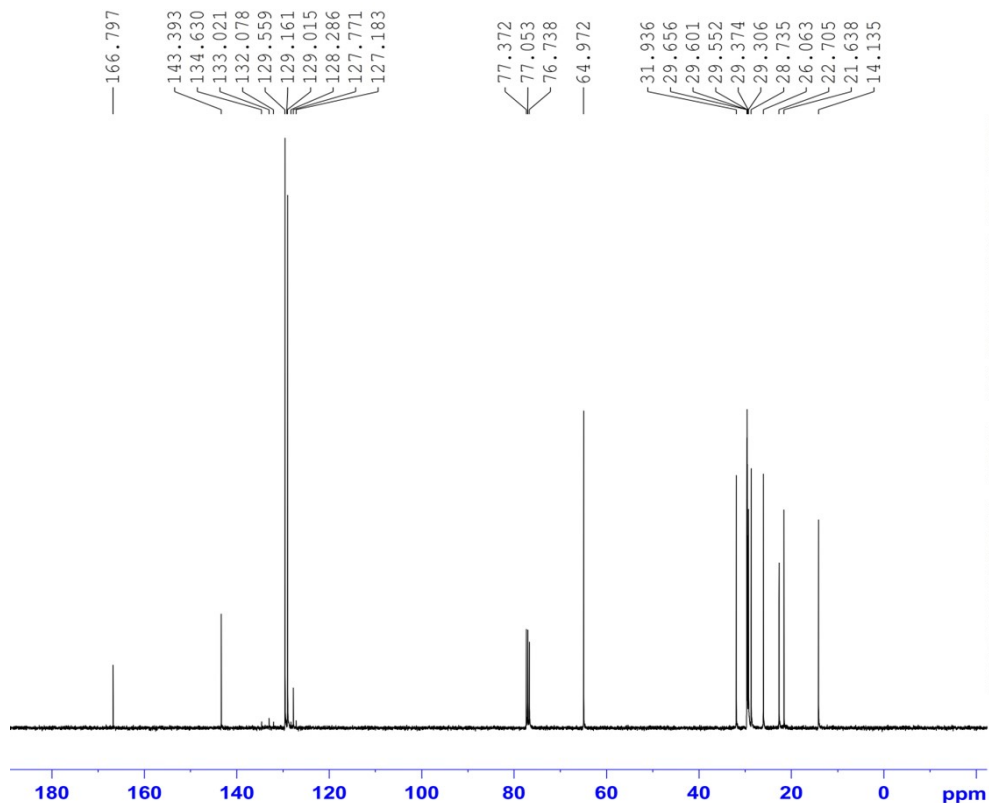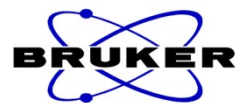

```

NAME          13C EN-4
EXPNO         1
PROCNO        1
Date_         20150818
Time          15.16
INSTRUM       spect
PROBHD        5 mm BBO BB-1H
PULPROG       zgpg
TD            66560
SOLVENT       CDCl3
NS            453
DS            0
SWH           40760.871 Hz
FIDRES        0.612393 Hz
AQ            0.8165193 sec
RG            287
DW            12.267 usec
DE            6.00 usec
TE            300.0 K
D1            3.00000000 sec
D11           0.03000000 sec
TDO           1
  
```

```

----- CHANNEL f1 -----
NUC1          13C
P1            7.00 usec
PL1           0.00 dB
SFO1          100.6208180 MHz
  
```

```

----- CHANNEL f2 -----
CPDPRG2       waltz16
NUC2          1H
PCPD2         80.00 usec
PL2           -1.00 dB
PL12          16.00 dB
PL13          20.00 dB
SFO2          400.1320007 MHz
SI            32768
SF            100.6127690 MHz
WDW           EM
SSB           0
LB            0.30 Hz
GB            0
PC            1.40
  
```

Fig: <sup>1</sup>H & <sup>13</sup>C NMR of Dodecyl 4-methylbenzoate, 21

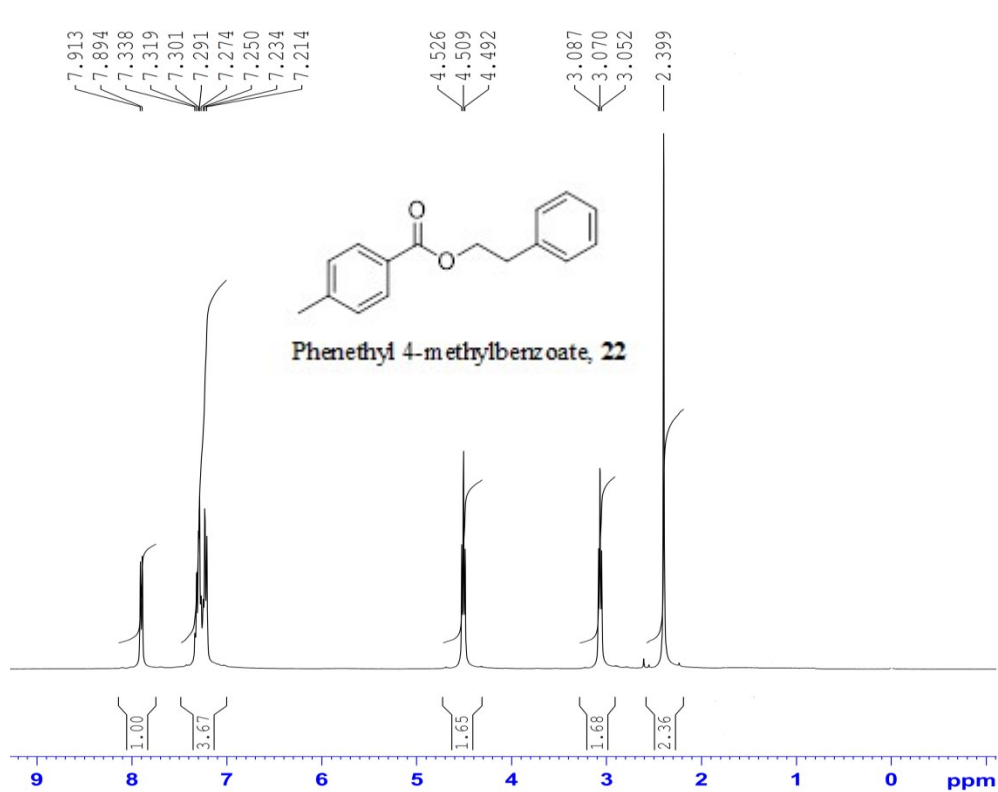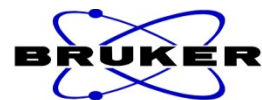

```

NAME          1H EN-10
EXPNO         1
PROCNO        1
Date_         20150818
Time          11.53
INSTRUM       spect
PROBHD        5 mm BBO BB-1H
PULPROG       zg
TD             32768
SOLVENT       CDC13
NS             16
DS             0
SWH            20000.000 Hz
FIDRES        0.610352 Hz
AQ             0.8192500 sec
RG             114
DW             25.000 usec
DE             6.00 usec
TE             300.0 K
D1             1.00000000 sec
TDO           1
  
```

```

----- CHANNEL f1 -----
NUC1          1H
P1             11.50 usec
PL1            -1.00 dB
SFO1          400.1304995 MHz
SI             16384
SF            400.1300086 MHz
WDW            EM
SSB            0
LB             1.00 Hz
GB             0
PC             1.00
  
```

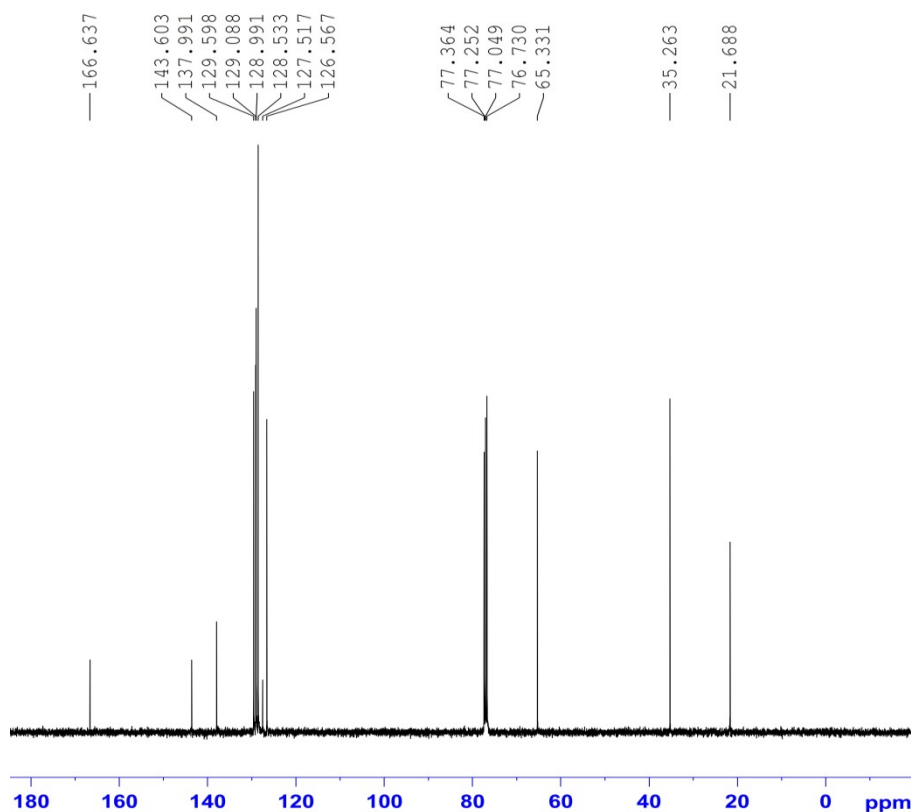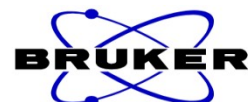

```

NAME          13C EN-10
EXPNO         1
PROCNO        1
Date_         20150818
Time          12.06
INSTRUM       spect
PROBHD        5 mm BBO BB-1H
PULPROG       zgpg
TD             66560
SOLVENT       CDC13
NS             677
DS             0
SWH            40760.871 Hz
FIDRES        0.612393 Hz
AQ             0.8165193 sec
RG             406
DW             12.267 usec
DE             6.00 usec
TE             300.0 K
D1             3.00000000 sec
D11            0.03000000 sec
TDO           1
  
```

```

----- CHANNEL f1 -----
NUC1          13C
P1             7.00 usec
PL1            0.00 dB
SFO1          100.6208180 MHz
  
```

```

----- CHANNEL f2 -----
CPDPRG2       waltz16
NUC2          1H
PCPD2         80.00 usec
PL2            -1.00 dB
PL12          16.00 dB
PL13          20.00 dB
SFO2          400.1320007 MHz
SI             32768
SF            100.6127690 MHz
WDW            EM
SSB            0
LB             0.30 Hz
GB             0
PC             1.40
  
```

Fig: <sup>1</sup>H & <sup>13</sup>C NMR of Phenethyl 4-methylbenzoate, 22

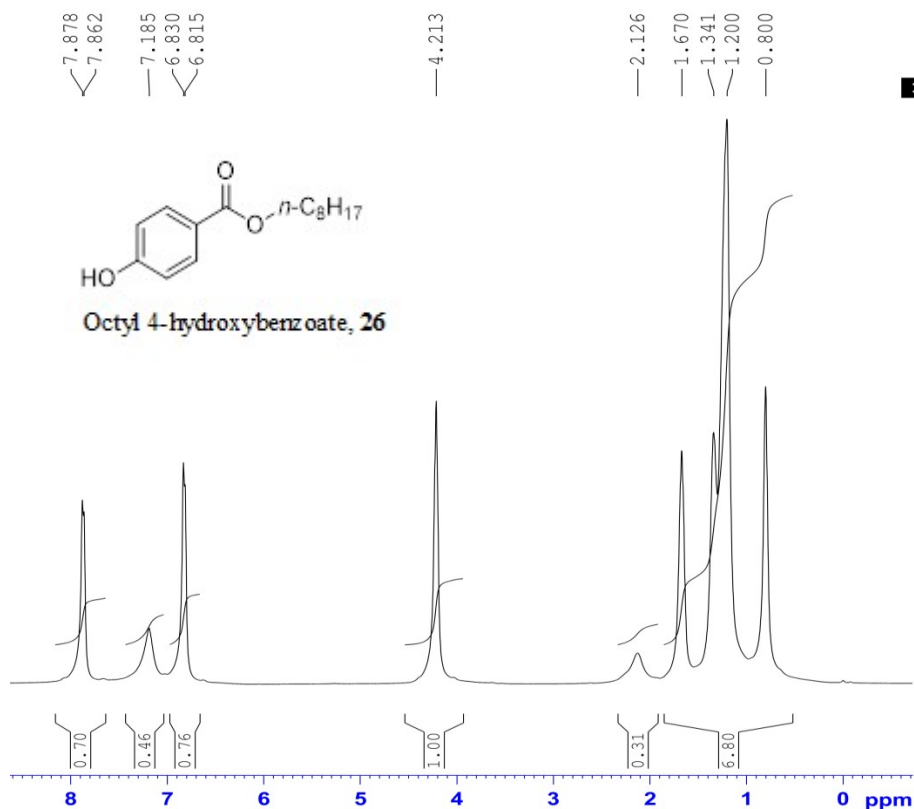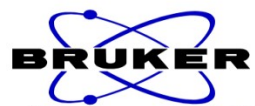

```

NAME 1H EN3
EXPNO 1
PROCNO 1
Date_ 20150528
Time 11.47
INSTRUM spect
PROBHD 5 mm BBO BB-1H
PULPROG zg
TD 32768
SOLVENT CDC13
NS 16
DS 0
SWH 20000.000 Hz
FIDRES 0.610352 Hz
AQ 0.8192500 sec
RG 28.5
DW 25.000 usec
DE 6.00 usec
TE 300.0 K
D1 1.00000000 sec
TDO 1

```

```

===== CHANNEL f1 =====
NUC1 1H
P1 11.50 usec
PL1 -1.00 dB
SFO1 400.1310341 MHz
SI 16394
SF 400.1300338 MHz
WDW EM
SSB 0
LB 1.00 Hz
GB 0
PC 1.00

```

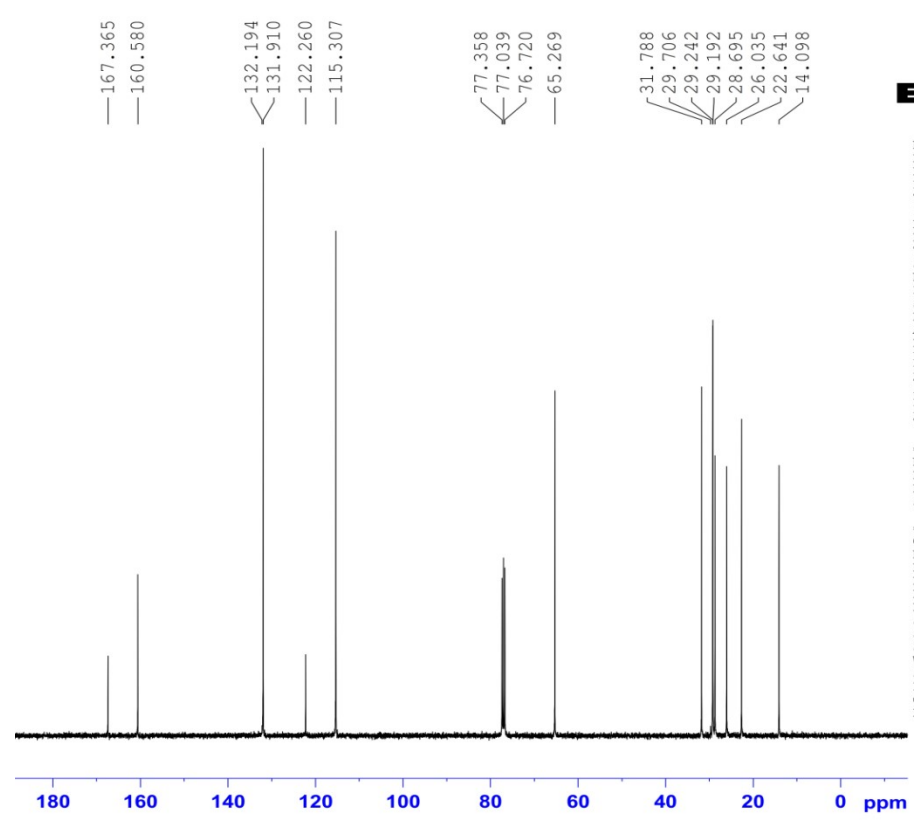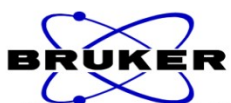

```

NAME 13C EN3
EXPNO 1
PROCNO 1
Date_ 20150528
Time 13.04
INSTRUM spect
PROBHD 5 mm BBO BB-1H
PULPROG zgpg
TD 66560
SOLVENT CDC13
NS 940
DS 0
SWH 40760.871 Hz
FIDRES 0.612393 Hz
AQ 0.8165193 sec
RG 256
DW 12.267 usec
DE 6.00 usec
TE 300.0 K
D1 4.00000000 sec
D11 0.03000000 sec
TDO 1

```

```

===== CHANNEL f1 =====
NUC1 13C
P1 7.00 usec
PL1 0.00 dB
SFO1 100.6208180 MHz

```

```

===== CHANNEL f2 =====
CPDPRG2 waltz16
NUC2 1H
PCPD2 80.00 usec
PL2 -1.00 dB
PL12 16.00 dB
PL13 20.00 dB
SFO2 400.1320007 MHz
SI 32768
SF 100.6127690 MHz
WDW EM
SSB 0
LB 0.30 Hz
GB 0
PC 1.40

```

Fig: <sup>1</sup>H & <sup>13</sup>C NMR of Octyl 4-hydroxybenzoate, 26

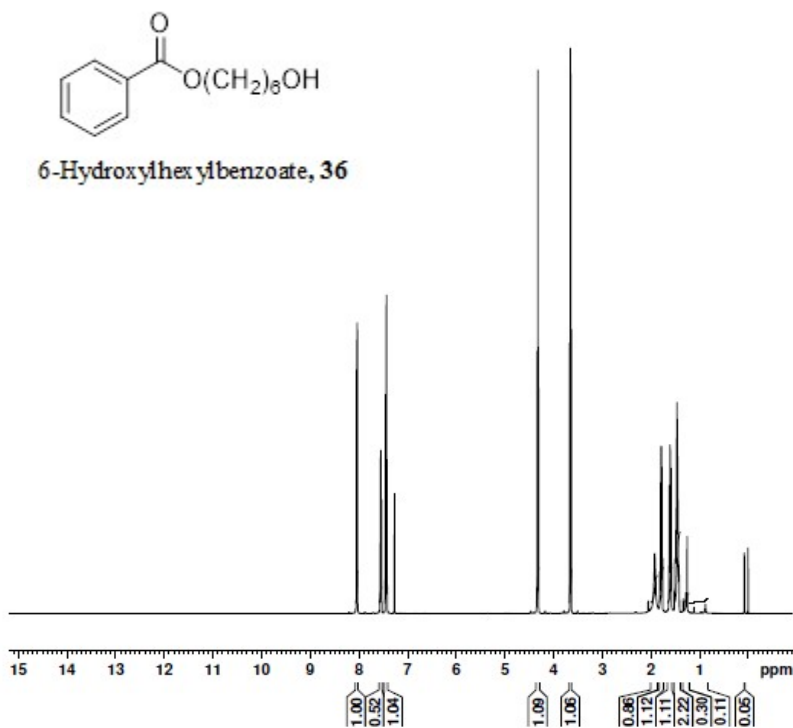

Current Data Parameters  
 NAME Dec26-2014  
 EXPNO 9  
 PROCNO 1

F2 - Acquisition Parameters  
 Date\_ 20141225  
 Time 23.32  
 INSTRUM spect  
 PROBHD 5 mm PABBO BB-  
 PULPROG zg30  
 TD 32768  
 SOLVENT CDCl3  
 NS 32  
 DS 2  
 SWH 10330.578 Hz  
 FIDRES 0.315264 Hz  
 AQ 1.5860212 sec  
 RG 80.6  
 DW 48.400 usec  
 DE 6.50 usec  
 TE 297.4 K  
 D1 1.00000000 sec  
 TD0 1

===== CHANNEL f1 =====  
 NUC1 1H  
 P1 10.65 usec  
 PL1 0.00 dB  
 PL1W 23.53637505 W  
 SFO1 500.1330885 MHz

F2 - Processing parameters  
 SI 32768  
 SF 500.1300070 MHz  
 WDW EM  
 SSB 0  
 LB 0.30 Hz  
 GB 0  
 PC 1.00

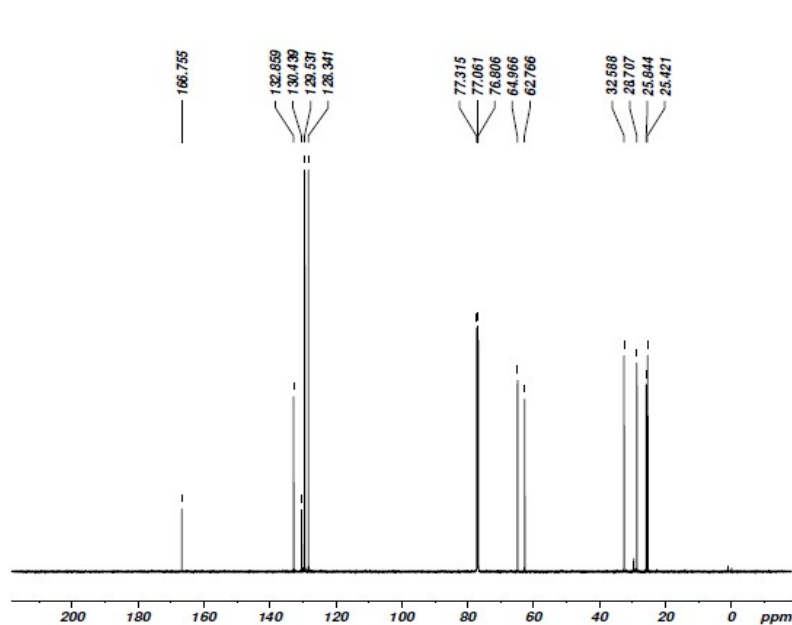

Current Data Parameters  
 NAME Dec26-2014  
 EXPNO 10  
 PROCNO 1

F2 - Acquisition Parameters  
 Date\_ 20141225  
 Time 0.15  
 INSTRUM spect  
 PROBHD 5 mm PABBO BB-  
 PULPROG zgpg30  
 TD 32768  
 SOLVENT CDCl3  
 NS 1024  
 DS 4  
 SWH 29761.904 Hz  
 FIDRES 0.908261 Hz  
 AQ 0.5505524 sec  
 RG 203  
 DW 16.800 usec  
 DE 6.50 usec  
 TE 298.6 K  
 D1 2.00000000 sec  
 D11 0.03000000 sec  
 TD0 1

===== CHANNEL f1 =====  
 NUC1 13C  
 P1 7.80 usec  
 PL1 0.00 dB  
 PL1W 70.83519745 W  
 SFO1 125.7703643 MHz

===== CHANNEL f2 =====  
 CPDPRG2 waltz16  
 NUC2 1H  
 PCPD2 80.00 usec  
 PL2 0.00 dB  
 PL12 17.51 dB  
 PL13 18.00 dB  
 PL2W 23.53637505 W  
 PL12W 0.41757989 W  
 PL13W 0.37302643 W  
 SFO2 500.1320065 MHz

Fig: <sup>1</sup>H & <sup>13</sup>C NMR of 6-Hydroxyhexylbenzoate, **36**

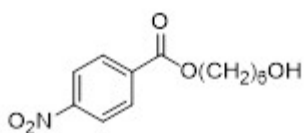

6-Hydroxyhexyl 4-nitrobenzoate, 37

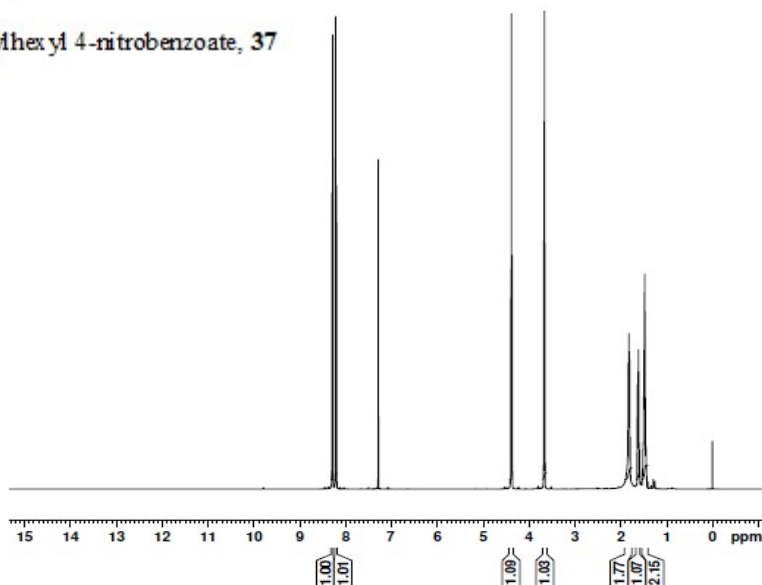

Current Data Parameters  
 NAME Dec26-2014  
 EXPNO 11  
 PROCNO 1

F2 - Acquisition Parameters  
 Date\_ 20141226  
 Time 0.21  
 INSTRUM spect  
 PROBHD 5 mm PABBO BB-  
 PULPROG zg30  
 TD 32768  
 SOLVENT CDCl3  
 NS 32  
 DS 2  
 SWH 10330.578 Hz  
 FIDRES 0.315264 Hz  
 AQ 1.5860212 sec  
 RG 71.8  
 DW 48.400 usec  
 DE 6.50 usec  
 TE 297.4 K  
 D1 1.0000000 sec  
 TDO 1

===== CHANNEL f1 =====  
 NUC1 1H  
 P1 10.65 usec  
 PL1 0.00 dB  
 PL1W 23.53637505 W  
 SFO1 500.1330885 MHz

F2 - Processing parameters  
 SI 32768  
 SF 500.1299959 MHz  
 WDW EM  
 SSB 0  
 LB 0.30 Hz  
 GB 0  
 PC 1.00

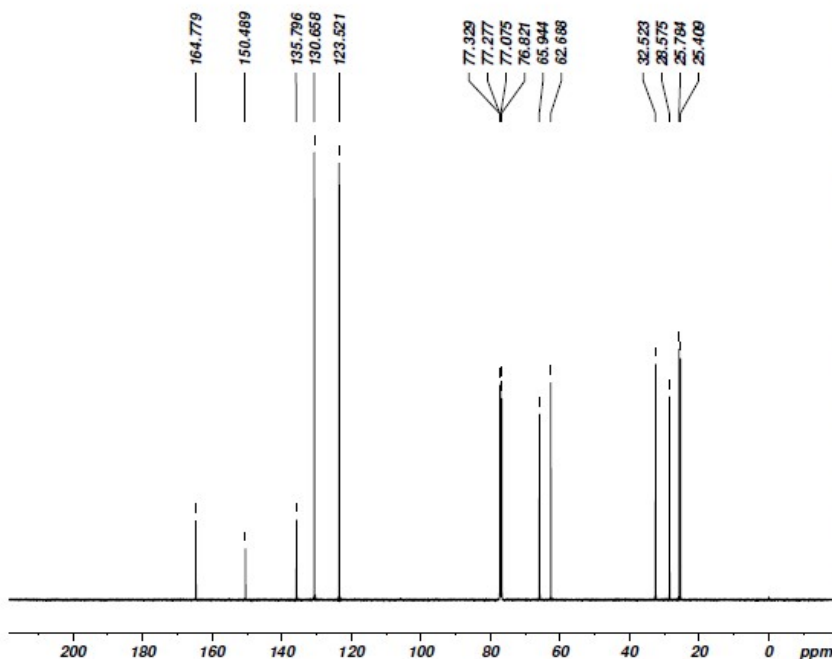

Current Data Parameters  
 NAME Dec26-2014  
 EXPNO 12  
 PROCNO 1

F2 - Acquisition Parameters  
 Date\_ 20141226  
 Time 0.51  
 INSTRUM spect  
 PROBHD 5 mm PABBO BB-  
 PULPROG zgpg30  
 TD 32768  
 SOLVENT CDCl3  
 NS 1024  
 DS 4  
 SWH 29761.904 Hz  
 FIDRES 0.908261 Hz  
 AQ 0.5505524 sec  
 RG 203  
 DW 16.800 usec  
 DE 8.50 usec  
 TE 298.7 K  
 D1 2.0000000 sec  
 D11 0.0300000 sec  
 TDO 1

===== CHANNEL f1 =====  
 NUC1 13C  
 P1 7.80 usec  
 PL1 0.00 dB  
 PL1W 70.83519745 W  
 SFO1 125.7703643 MHz

===== CHANNEL f2 =====  
 CPDPRG2 waltz16  
 NUC2 1H  
 PCPD2 80.00 usec  
 PL2 0.00 dB  
 PL12 17.51 dB  
 PL13 18.00 dB  
 PL2W 23.53637505 W  
 PL12W 0.41757989 W  
 PL13W 0.37302643 W  
 SFO2 500.1320005 MHz

Fig: <sup>1</sup>H & <sup>13</sup>C NMR of 6-Hydroxyhexyl 4-nitrobenzoate, 37

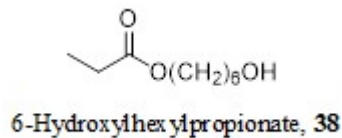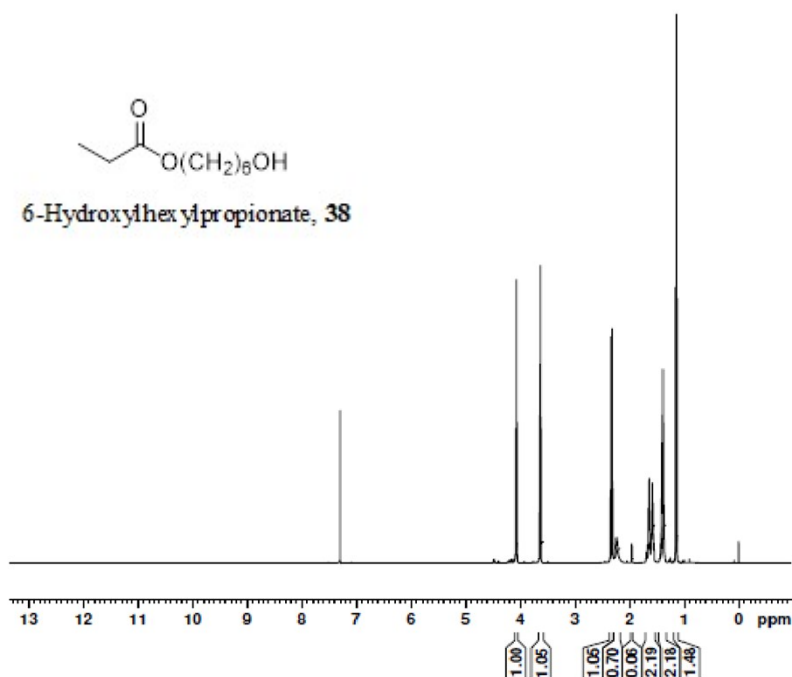

**Current Data Parameters**  
 NAME Dec26-2014  
 EXPNO 3  
 PROCNO 1

**F2 - Acquisition Parameters**  
 Date\_ 20141226  
 Time 1.26  
 INSTRUM spect  
 PROBHD 5 mm PABBO BB-  
 PULPROG zg30  
 TD 32768  
 SOLVENT CDCl3  
 NS 32  
 DS 2  
 SWH 10330.578 Hz  
 FIDRES 0.315264 Hz  
 AQ 1.5860212 sec  
 RG 57  
 DW 48.400 usec  
 DE 6.50 usec  
 TE 296.9 K  
 D1 1.00000000 sec  
 TDO 1

===== CHANNEL f1 =====  
 NUC1 1H  
 P1 10.65 usec  
 PL1 0.00 dB  
 PL1W 23.53637505 W  
 SFO1 500.1330885 MHz

**F2 - Processing parameters**  
 SI 32768  
 SF 500.1299912 MHz  
 WDW EM  
 SSB 0  
 LB 0.30 Hz  
 GB 0  
 PC 1.00

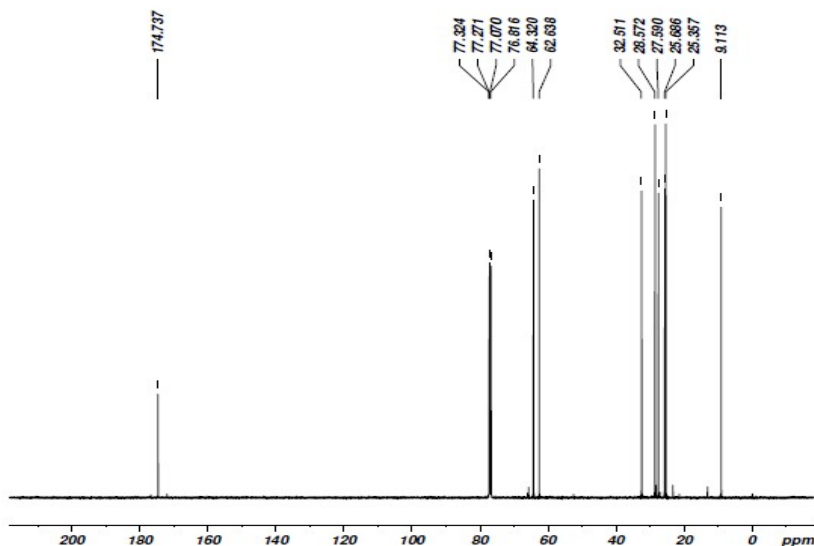

**Current Data Parameters**  
 NAME Dec26-2014  
 EXPNO 4  
 PROCNO 1

**F2 - Acquisition Parameters**  
 Date\_ 20141226  
 Time 1.53  
 INSTRUM spect  
 PROBHD 5 mm PABBO BB-  
 PULPROG zgpg30  
 TD 32768  
 SOLVENT CDCl3  
 NS 1024  
 DS 4  
 SWH 29761.904 Hz  
 FIDRES 0.908261 Hz  
 AQ 0.5505524 sec  
 RG 203  
 DW 16.800 usec  
 DE 6.50 usec  
 TE 298.6 K  
 D1 2.00000000 sec  
 D11 0.03000000 sec  
 TDO 1

===== CHANNEL f1 =====  
 NUC1 13C  
 P1 7.80 usec  
 PL1 0.00 dB  
 PL1W 70.83519745 W  
 SFO1 125.7703643 MHz

===== CHANNEL f2 =====  
 CPDPRG2 walz16  
 NUC2 1H  
 PCPD2 80.00 usec  
 PL2 0.00 dB  
 PL12 17.51 dB  
 PL13 18.00 dB  
 PL2W 23.53637505 W  
 PL12W 0.41757989 W  
 PL13W 0.37302643 W  
 SFO2 500.1320005 MHz

Fig: <sup>1</sup>H & <sup>13</sup>C NMR of 6-Hydroxyhexylpropionate, **38**



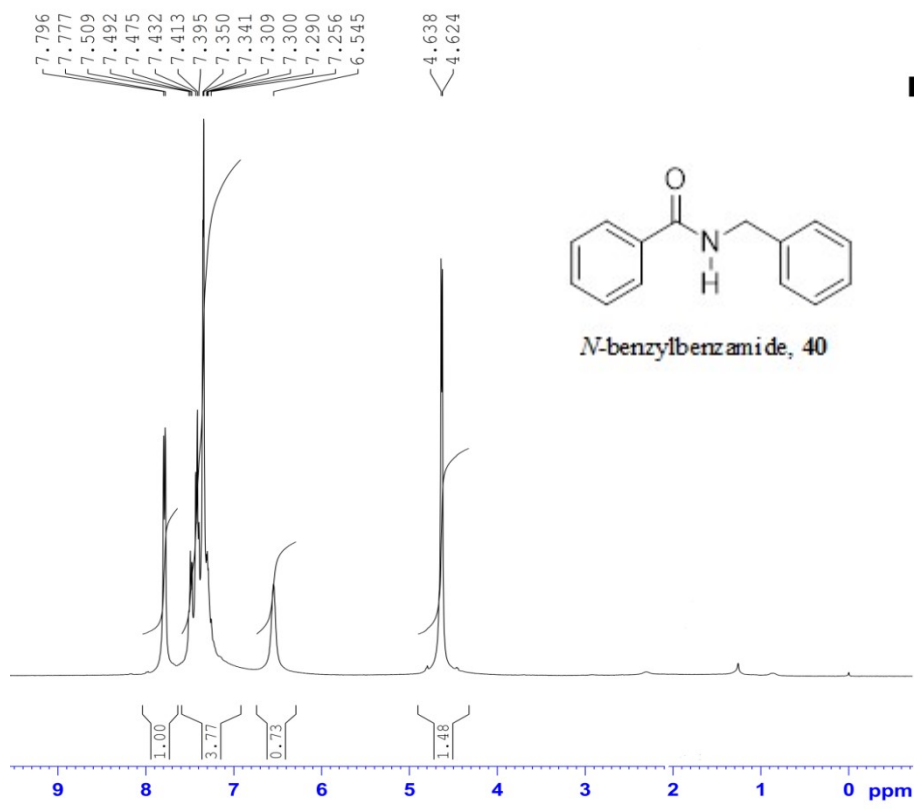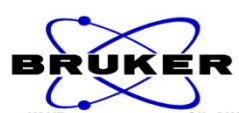

```

NAME 1H AN1
EXPNO 1
PROCNO 1
Date_ 20150611
Time_ 10.47
INSTRUM spect
PROBHD 5 mm BBO BB-1H
PULPROG zg
TD 32768
SOLVENT CDCl3
NS 16
DS 0
SWH 20000.000 Hz
FIDRES 0.610352 Hz
AQ 0.8192500 sec
RG 101
DW 25.000 usec
DE 6.00 usec
TE 300.0 K
D1 1.00000000 sec
TD0 1

===== CHANNEL f1 =====
NUC1 1H
P1 11.50 usec
PL1 -1.00 dB
SFO1 400.1306386 MHz
SI 16384
SF 400.1300061 MHz
WDW EM
SSB 0
LB 1.00 Hz
GB 0
PC 1.00

```

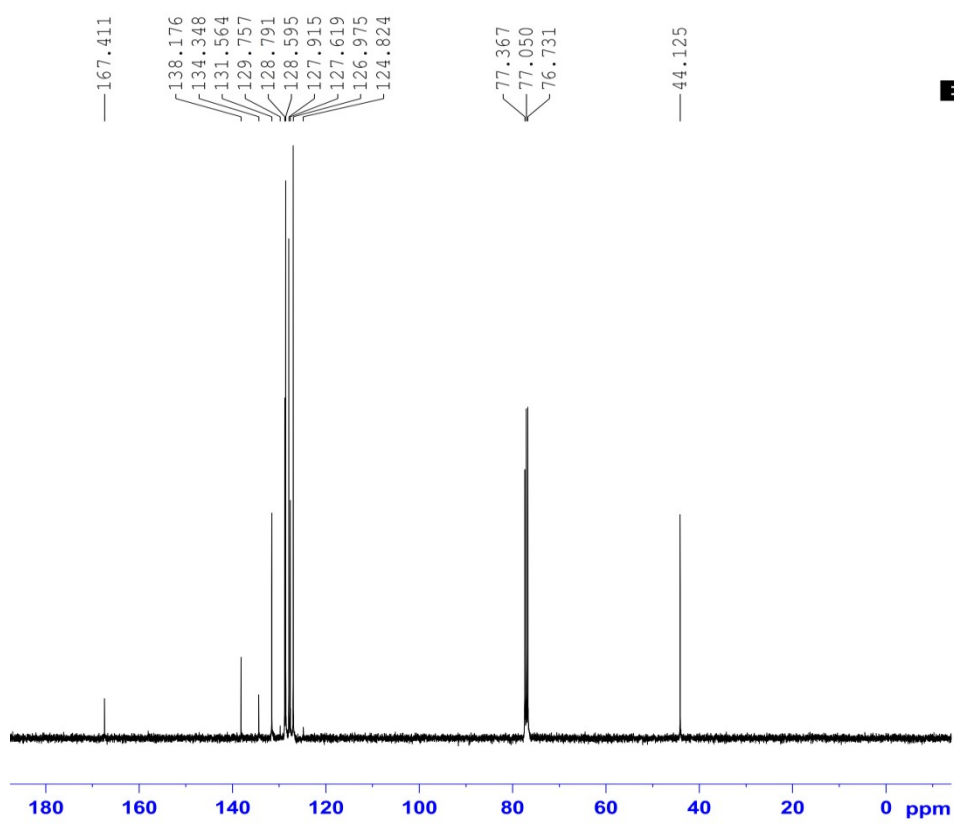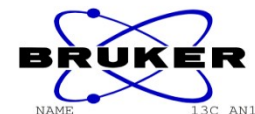

```

NAME 13C AN1
EXPNO 1
PROCNO 1
Date_ 20150611
Time_ 11.44
INSTRUM spect
PROBHD 5 mm BBO BB-1H
PULPROG zgpg
TD 66560
SOLVENT CDCl3
NS 872
DS 0
SWH 40760.871 Hz
FIDRES 0.612393 Hz
AQ 0.8165193 sec
RG 256
DW 12.267 usec
DE 6.00 usec
TE 300.0 K
D1 3.00000000 sec
D11 0.03000000 sec
TD0 1

===== CHANNEL f1 =====
NUC1 13C
P1 7.00 usec
PL1 0.00 dB
SFO1 100.6208180 MHz

===== CHANNEL f2 =====
CPDPRG2 waltz16
NUC2 1H
PCPD2 80.00 usec
PL2 -1.00 dB
PL12 16.00 dB
PL13 20.00 dB
SFO2 400.1320007 MHz
SI 32768
SF 100.6127690 MHz
WDW EM
SSB 0
LB 0.30 Hz
GB 0
PC 1.40

```

Fig: <sup>1</sup>H & <sup>13</sup>C NMR of *N*-benzylbenzamide, 40

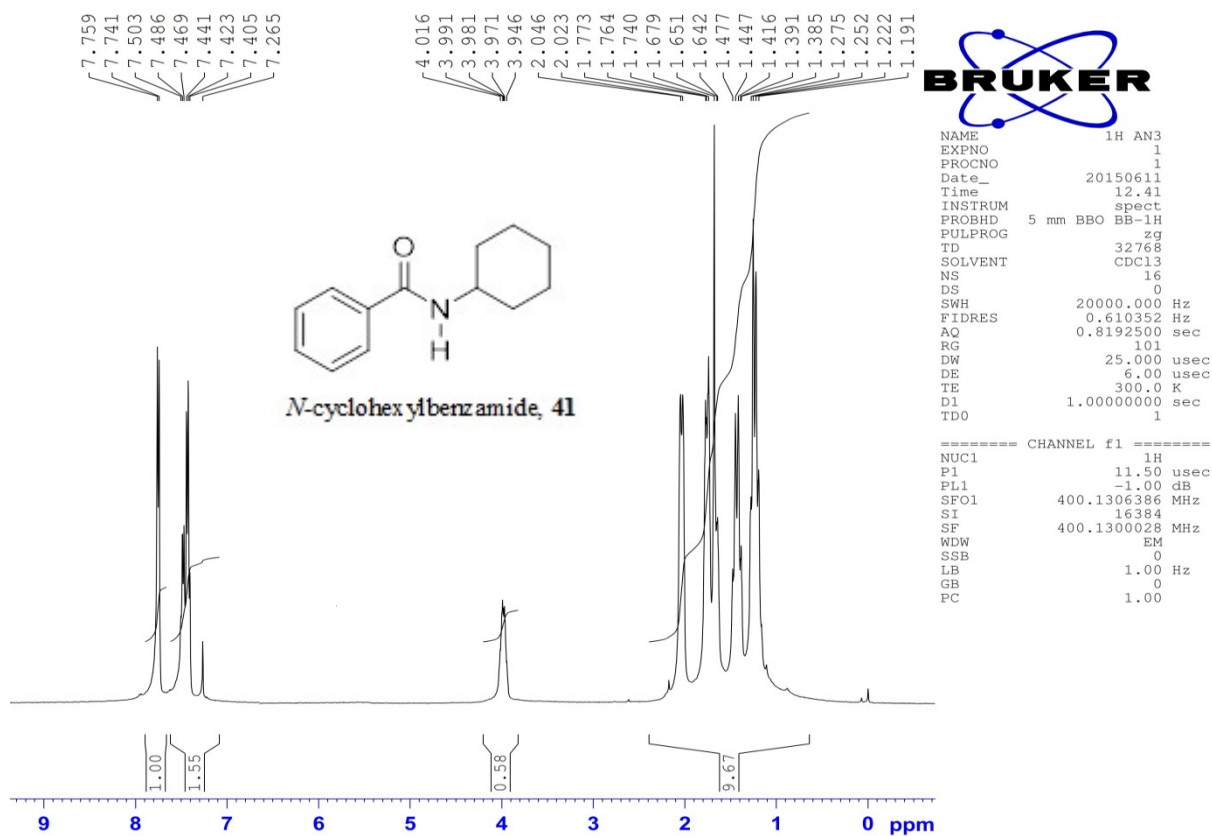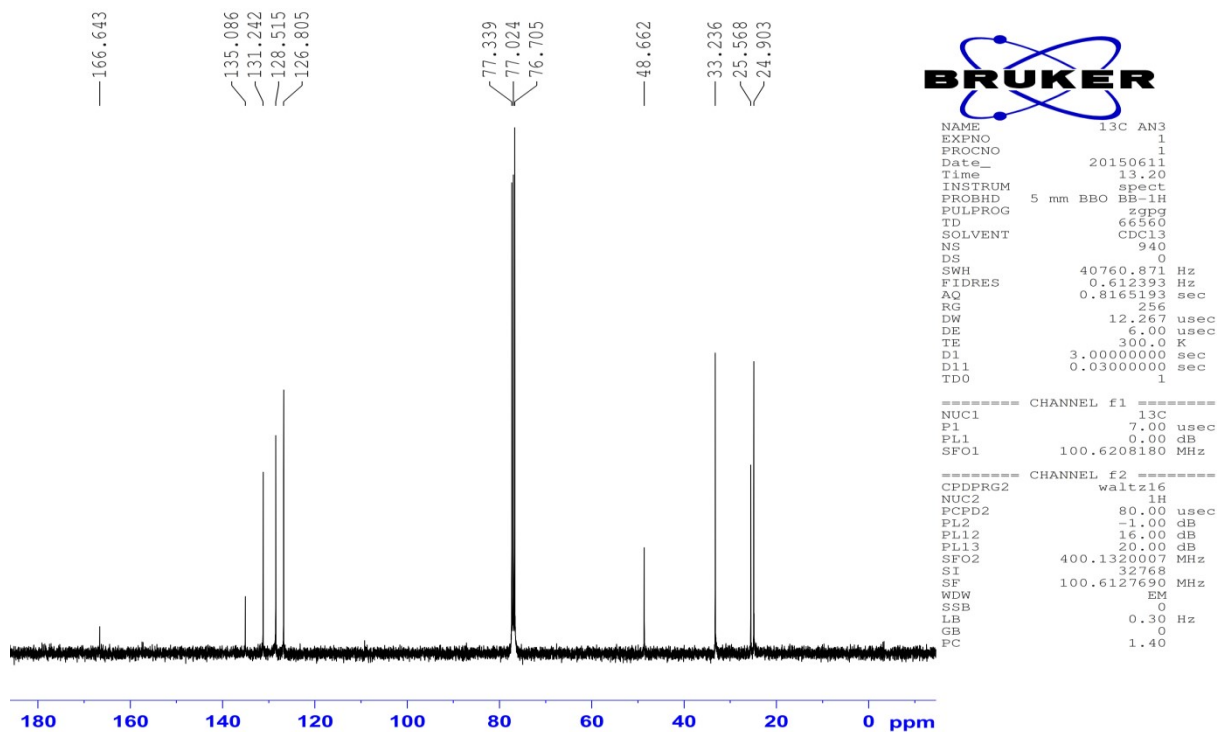

Fig:  $^1\text{H}$  &  $^{13}\text{C}$  NMR of *N*-cyclohexylbenzamide, 41

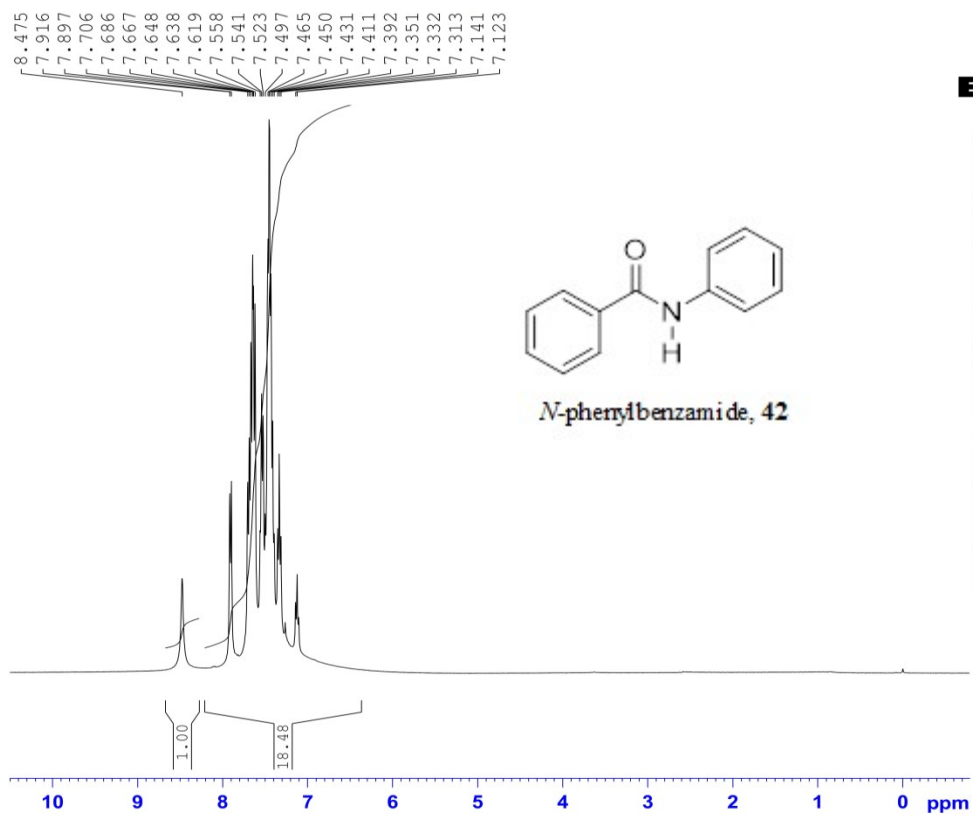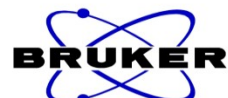

```

NAME          1H AN2
EXPNO         1
PROCNO        1
Date_         20150611
Time_         11.47
INSTRUM       spect
PROBHD        5 mm BBO BB-1H
PULPROG       zgpgg
TD            32768
SOLVENT       CDC13
NS            16
DS            0
SWH           20000.000 Hz
FIDRES        0.610352 Hz
AQ            0.8192500 sec
RG            101
DW            25.000 usec
DE            6.00 usec
TE            300.0 K
D1            1.00000000 sec
TD0           1
  
```

```

===== CHANNEL f1 =====
NUC1          1H
P1            11.50 usec
PL1           -1.00 dB
SFO1          400.1306386 MHz
SI            16384
SF            400.1300038 MHz
WDW           EM
SSB           0
LB            1.00 Hz
GB            0
PC            1.00
  
```

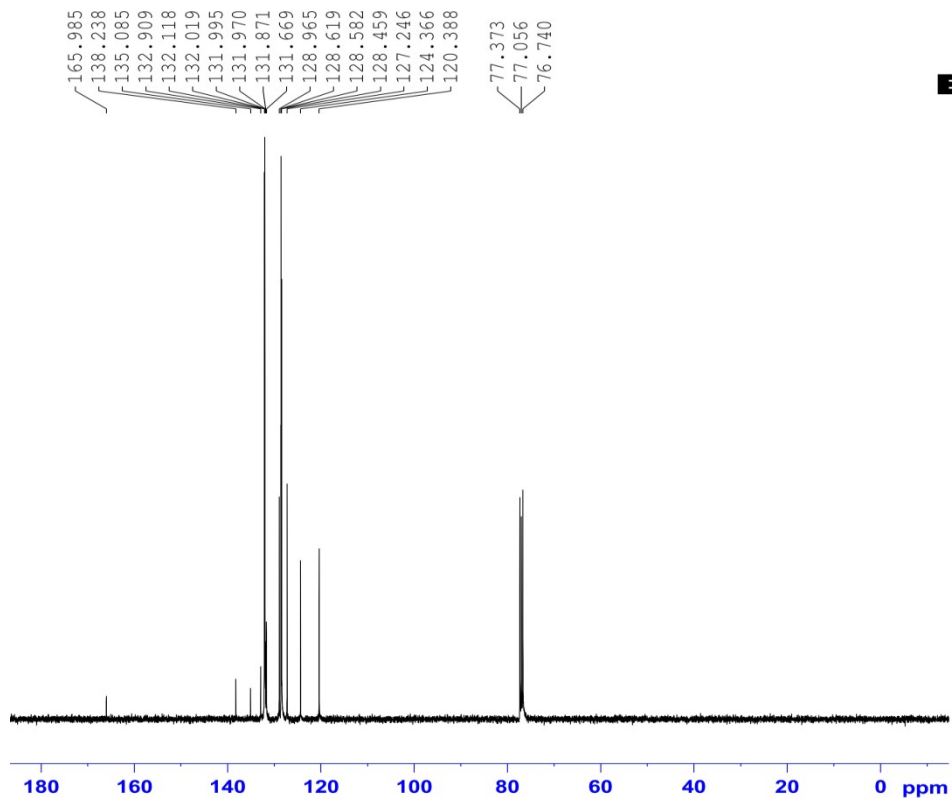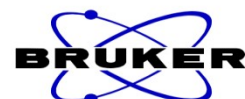

```

NAME          13C AN2
EXPNO         1
PROCNO        1
Date_         20150611
Time_         12.35
INSTRUM       spect
PROBHD        5 mm BBO BB-1H
PULPROG       zgpgg
TD            66560
SOLVENT       CDC13
NS            731
DS            0
SWH           40760.871 Hz
FIDRES        0.612393 Hz
AQ            0.8165193 sec
RG            256
DW            12.267 usec
DE            6.00 usec
TE            300.0 K
D1            3.00000000 sec
D11           0.03000000 sec
TD0           1
  
```

```

===== CHANNEL f1 =====
NUC1          13C
P1            7.00 usec
PL1           0.00 dB
SFO1          100.6208180 MHz
  
```

```

===== CHANNEL f2 =====
CPDPRG2       waltz16
NUC2          1H
PCPD2         80.00 usec
PL2           -1.00 dB
PL12          16.00 dB
PL13          20.00 dB
SFO2          400.1320007 MHz
SI            32768
SF            100.6127690 MHz
WDW           EM
SSB           0
LB            0.30 Hz
GB            0
PC            1.40
  
```

Fig: <sup>1</sup>H & <sup>13</sup>C NMR of *N*-phenylbenzamide, 42

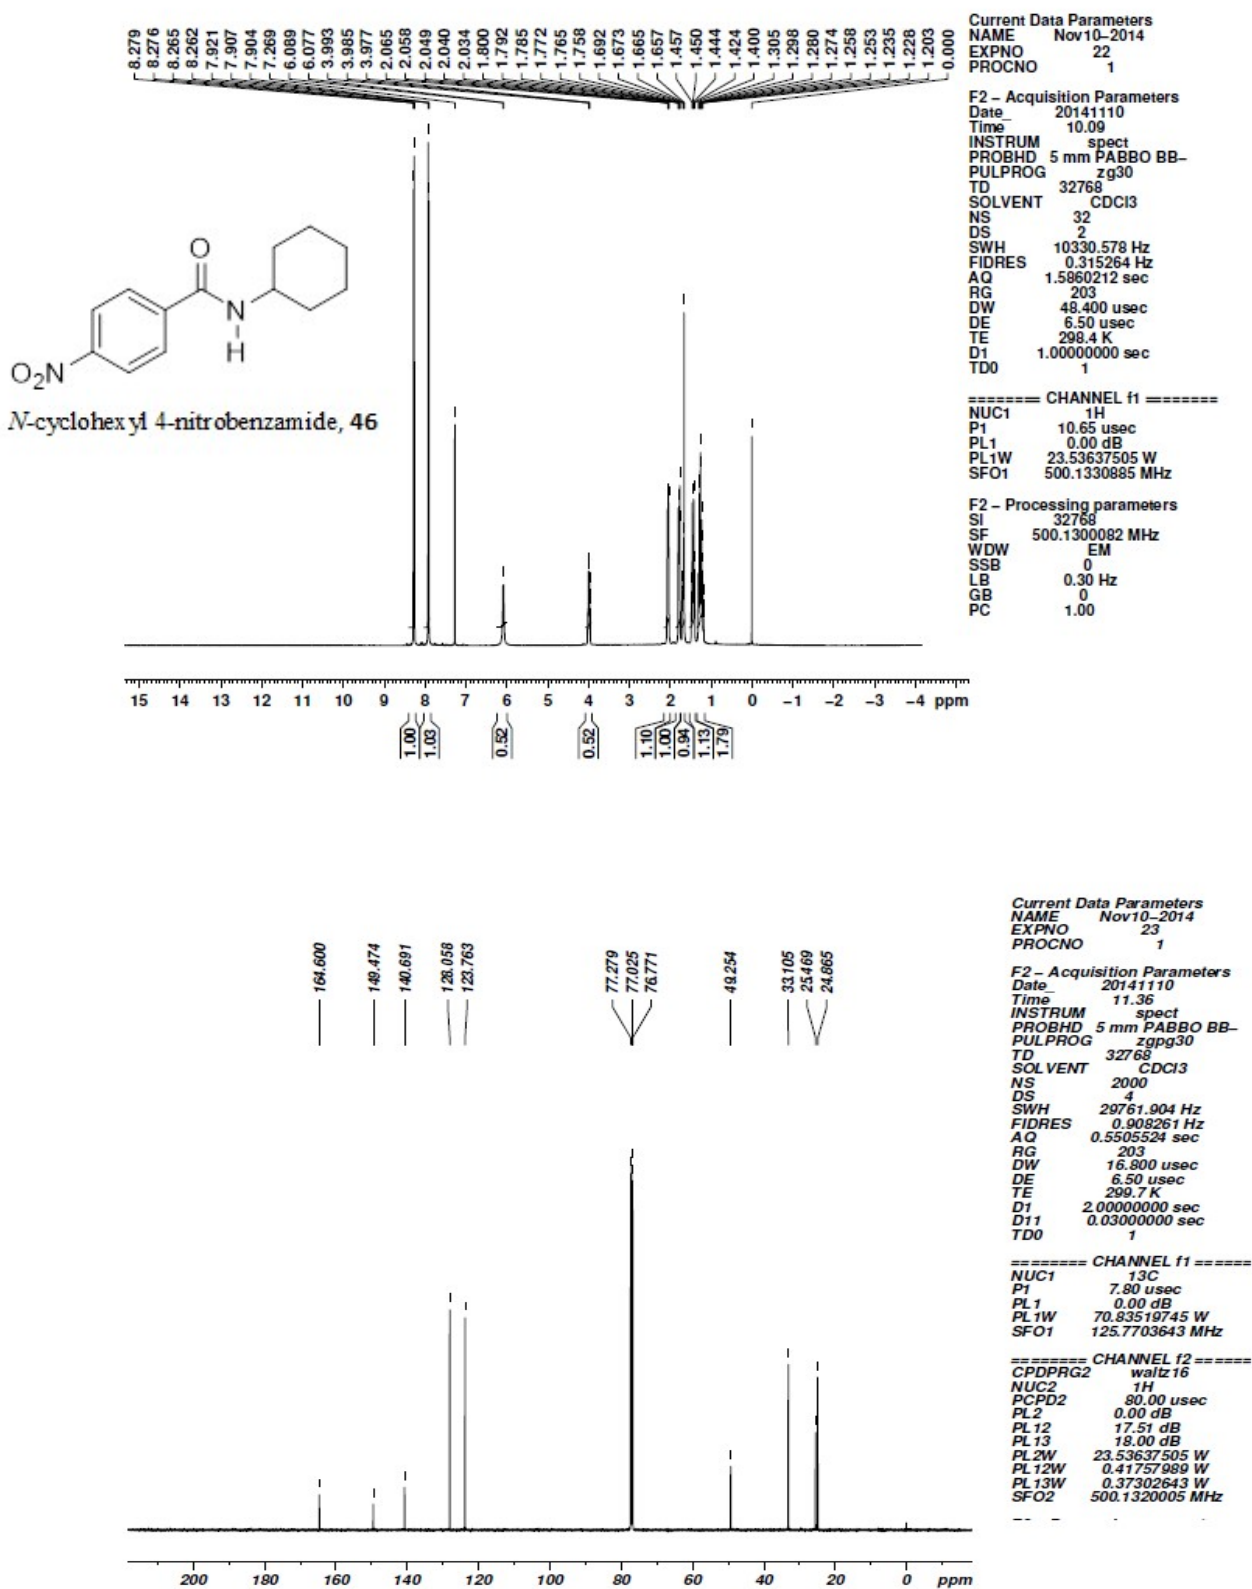

Fig: <sup>1</sup>H & <sup>13</sup>C NMR of *N*-cyclohexyl 4-nitrobenzamide, 46
